# Supplementary material for: Identification of Pharmacological Modulators of HMGB1-Induced Inflammatory Response by Cell-Based Screening
Source: PLoS One. 2013 Jun 14;8(6):e65994. doi: 10.1371/journal.pone.0065994 (PMC3682954; doi:10.1371/journal.pone.0065994)
Supplement: Table S1 — A full list of the genes investigated in the real-time PCR array experiments. (XLS) [file pone.0065994.s001.xls]

## Sheet: TLR array gene list
Gene Table
Position	Unigene	GeneBank	Symbol	Description	Gene Name
A01	Mm.392569	NM_010472	Agfg1	ArfGAP with FG repeats 1	AU045498, C130049H11Rik, C85612, D730048C23Rik, Hrb, RAB, Rip
A02	Mm.4475	NM_013482	Btk	Bruton agammaglobulinemia tyrosine kinase	AI528679, xid
A03	Mm.336851	NM_009812	Casp8	Caspase 8	CASP-8, FLICE, MACH, Mch5
A04	Mm.290320	NM_011333	Ccl2	Chemokine (C-C motif) ligand 2	AI323594, HC11, JE, MCAF, MCP-1, MCP1, SMC-CF, Scya2, Sigje
A05	Mm.3460	NM_009841	Cd14	CD14 antigen	-
A06	Mm.89474	NM_009855	Cd80	CD80 antigen	B71, Cd28l, Ly-53, Ly53, MIC17, TSA1
A07	Mm.1452	NM_019388	Cd86	CD86 antigen	B7, B7-2, B7.2, B70, CLS1, Cd28l2, ETC-1, Ly-58, Ly58, MB7, MB7-2, TS, A-2
A08	Mm.439656	NM_009883	Cebpb	CCAAT/enhancer binding protein (C/EBP), beta	C, EBPbeta, CRP2, IL-6DBP, LAP, LIP, NF-IL6, NF-M, Nfil6
A09	Mm.3996	NM_007700	Chuk	Conserved helix-loop-helix ubiquitous kinase	AI256658, Chuk1, Fbx24, Fbxo24, IKBKA, IKK1, Ikka, MGC25325, NFKBIKA
A10	Mm.248327	NM_019948	Clec4e	C-type lectin domain family 4, member e	C86253, Clecsf9, Mincle
A11	Mm.4922	NM_009969	Csf2	Colony stimulating factor 2 (granulocyte-macrophage)	Csfgm, Gm-CSf, MGC151255, MGC151257, MGI-IGM
A12	Mm.1238	NM_009971	Csf3	Colony stimulating factor 3 (granulocyte)	Csfg, G-CSF, MGI-IG
B01	Mm.877	NM_021274	Cxcl10	Chemokine (C-X-C motif) ligand 10	C7, CRG-2, INP10, IP-10, IP10, Ifi10, Scyb10, gIP-10, mob-1
B02	Mm.378990	NM_011163	Eif2ak2	Eukaryotic translation initiation factor 2-alpha kinase 2	2310047A08Rik, 4732414G15Rik, AI467567, AI747578, Pkr, Prkr, Tik
B03	Mm.405823	NM_007922	Elk1	ELK1, member of ETS oncogene family	Elk-1
B04	Mm.5126	NM_010175	Fadd	Fas (TNFRSF6)-associated via death domain	Mort1, FADD
B05	Mm.246513	NM_010234	Fos	FBJ osteosarcoma oncogene	D12Rfj1, c-fos, cFos
B06	Mm.313345	NM_010439	Hmgb1	High mobility group box 1	DEF, HMG-1, Hmg1, MGC103168, MGC103169, MGC117896, MGC117897, SBP-1, amphoterin, p30
B07	Mm.334313	NM_008284	Hras1	Harvey rat sarcoma virus oncogene 1	H-ras, Ha-ras, Harvey-ras, Hras-1, Kras2, c-H-ras, c-Ha-ras, c-rasHa, ras
B08	Mm.6388	NM_010479	Hspa1a	Heat shock protein 1A	Hsp70-3, Hsp70.3, Hsp72, MGC189852, hsp68, hsp70A1
B09	Mm.1777	NM_010477	Hspd1	Heat shock protein 1 (chaperonin)	60kDa, Hsp60
B10	Mm.1245	NM_010510	Ifnb1	Interferon beta 1, fibroblast	IFN-beta, IFNB, Ifb
B11	Mm.240327	NM_008337	Ifng	Interferon gamma	IFN-g, Ifg
B12	Mm.277886	NM_010546	Ikbkb	Inhibitor of kappaB kinase beta	AI132552, IKK-2, IKK-beta, IKK2, IKK[b], IKKbeta
C01	Mm.874	NM_010548	Il10	Interleukin 10	CSIF, Il-10
C02	Mm.103783	NM_008351	Il12a	Interleukin 12A	IL-12p35, Il-12a, Ll12a, MGC151228, MGC151232, p35
C03	Mm.15534	NM_010554	Il1a	Interleukin 1 alpha	Il-1a
C04	Mm.222830	NM_008361	Il1b	Interleukin 1 beta	IL-1beta, Il-1b
C05	Mm.896	NM_008362	Il1r1	Interleukin 1 receptor, type I	CD121a, CD121b, IL-iR, Il1r-1, MGC129154
C06	Mm.14190	NM_008366	Il2	Interleukin 2	Il-2
C07	Mm.1019	NM_031168	Il6	Interleukin 6	Il-6
C08	Mm.2856	NM_010559	Il6ra	Interleukin 6 receptor, alpha	CD126, IL-6R, Il6r, MGC30256
C09	Mm.38241	NM_008363	Irak1	Interleukin-1 receptor-associated kinase 1	AA408924, IRAK, IRAK-1, IRAK1-S, Il1rak, Plpk, mPLK
C10	Mm.152142	NM_172161	Irak2	Interleukin-1 receptor-associated kinase 2	6330415L08Rik, AI649099, IRAK-2, MGC102586
C11	Mm.105218	NM_008390	Irf1	Interferon regulatory factor 1	AU020929, Irf-1
C12	Mm.3960	NM_016849	Irf3	Interferon regulatory factor 3	C920001K05Rik, IRF-3, MGC91046
D01	Mm.275071	NM_010591	Jun	Jun oncogene	AP-1, Junc, c-jun
D02	Mm.87787	NM_010735	Lta	Lymphotoxin A	LT, LT-[a], LT-alpha, LT[a], LTalpha, Ltx, MGC117668, TNF-beta, TNFSF1, Tnfb, Tnfsf1b, hlb382
D03	Mm.2639	NM_010745	Ly86	Lymphocyte antigen 86	MD-1, MD1
D04	Mm.116844	NM_016923	Ly96	Lymphocyte antigen 96	ESOP-1, MD-2, MD2, MGC151162
D05	Mm.18494	NM_008928	Map2k3	Mitogen-activated protein kinase kinase 3	AW212142, MEK3, MKK3, Prkmk3, mMKK3b
D06	Mm.412922	NM_009157	Map2k4	Mitogen-activated protein kinase kinase 4	JNKK1, MEK4, MKK4, PRKMK4, Sek1, Serk1
D07	Mm.15918	NM_011945	Map3k1	Mitogen-activated protein kinase kinase kinase 1	MAPKKK1, MEKK1, Mekk
D08	Mm.258589	NM_172688	Map3k7	Mitogen-activated protein kinase kinase kinase 7	B430101B05, C87327, Tak1
D09	Mm.21495	NM_016700	Mapk8	Mitogen-activated protein kinase 8	AI849689, JNK, JNK1, Prkm8, SAPK1
D10	Mm.43081	NM_013931	Mapk8ip3	Mitogen-activated protein kinase 8 interacting protein 3	BB120594, D17Wsu15e, JIP-3, JSAP1, JSAP1a, JSAP1b, JSAP1c, JSAP1d, Jip3, Syd2, mKIAA1066
D11	Mm.68933	NM_016961	Mapk9	Mitogen-activated protein kinase 9	AI851083, JNK2, Prkm9, p54aSAPK
D12	Mm.3177	NM_010739	Muc13	Mucin 13, epithelial transmembrane	114, A10, 14, A10, AI159736, Lrrp, Ly64, NJ-1
E01	Mm.213003	NM_010851	Myd88	Myeloid differentiation primary response gene 88	-
E02	Mm.256765	NM_008689	Nfkb1	Nuclear factor of kappa light polypeptide gene enhancer in B-cells 1, p105	NF-KB1, NF-kappaB, NF-kappaB1, p105, p50, p50, p105
E03	Mm.102365	NM_019408	Nfkb2	Nuclear factor of kappa light polypeptide gene enhancer in B-cells 2, p49/p100	NF-kappaB2, lyt, p49, p49, p100, p50B, p52
E04	Mm.170515	NM_010907	Nfkbia	Nuclear factor of kappa light polypeptide gene enhancer in B-cells inhibitor, alpha	AI462015, Nfkbi
E05	Mm.220333	NM_010908	Nfkbib	Nuclear factor of kappa light polypeptide gene enhancer in B-cells inhibitor, beta	IKB-beta, IKappaBbeta, IkB, IkBb, MGC36057
E06	Mm.300795	NM_010909	Nfkbil1	Nuclear factor of kappa light polypeptide gene enhancer in B-cells inhibitor-like 1	Def-7, IKBL
E07	Mm.238146	NM_172766	Nfrkb	Nuclear factor related to kappa B binding protein	A530090G11Rik
E08	Mm.442385	NM_011630	Nr2c2	Nuclear receptor subfamily 2, group C, member 2	KIAA4145, MGC124356, MGC124357, MGC124358, TAK1, Tr4, mKIAA4145
E09	Mm.28957	NM_023324	Peli1	Pellino 1	2810468L03Rik, A930031K15Rik, AA409794, AI586297, D11Ertd676e
E10	Mm.21855	NM_009402	Pglyrp1	Peptidoglycan recognition protein 1	PGRP, PGRP-S, Pglyrp, Tag7, Tasg7, Tnfsf3l
E11	Mm.212789	NM_011144	Ppara	Peroxisome proliferator activated receptor alpha	4933429D07Rik, AW742785, Nr1c1, PPAR-alpha, PPARalpha, Ppar
E12	Mm.292547	NM_011198	Ptgs2	Prostaglandin-endoperoxide synthase 2	COX2, Cox-2, PGHS-2, PHS-2, Pghs2, TIS10
F01	Mm.4869	NM_009044	Rel	Reticuloendotheliosis oncogene	c-Rel
F02	Mm.249966	NM_009045	Rela	V-rel reticuloendotheliosis viral oncogene homolog A (avian)	p65
F03	Mm.112765	NM_138952	Ripk2	Receptor (TNFRSF)-interacting serine-threonine kinase 2	2210420D18Rik, CARD3, CARDIAK, CCK, D4Bwg0615e, RICK, RIP2
F04	Mm.34580	NM_019786	Tbk1	TANK-binding kinase 1	1200008B05Rik, AI462036, AW048562, MGC150301, MGC150302
F05	Mm.203952	NM_174989	Ticam1	Toll-like receptor adaptor molecule 1	AW046014, AW547018, TICAM-1, TRIF
F06	Mm.149280	NM_173394	Ticam2	Toll-like receptor adaptor molecule 2	B430113A10, MGC107370, TICAM-2, TRAM, Tirp, Trif
F07	Mm.23987	NM_054096	Tirap	Toll-interleukin 1 receptor (TIR) domain-containing adaptor protein	AA407980, C130027E04Rik, Mal, Tlr4ap, Wyatt
F08	Mm.273024	NM_030682	Tlr1	Toll-like receptor 1	-
F09	Mm.87596	NM_011905	Tlr2	Toll-like receptor 2	Ly105
F10	Mm.33874	NM_126166	Tlr3	Toll-like receptor 3	AI957183
F11	Mm.38049	NM_021297	Tlr4	Toll-like receptor 4	Lps, Ly87, Ran, M1, Rasl2-8
F12	Mm.116894	NM_016928	Tlr5	Toll-like receptor 5	-
G01	Mm.42146	NM_011604	Tlr6	Toll-like receptor 6	-
G02	Mm.23979	NM_133211	Tlr7	Toll-like receptor 7	-
G03	Mm.196676	NM_133212	Tlr8	Toll-like receptor 8	-
G04	Mm.44889	NM_031178	Tlr9	Toll-like receptor 9	-
G05	Mm.1293	NM_013693	Tnf	Tumor necrosis factor	DIF, MGC151434, TNF-alpha, TNFSF2, TNFalpha, Tnfa, Tnfsf1a
G06	Mm.116683	NM_009397	Tnfaip3	Tumor necrosis factor, alpha-induced protein 3	A20, Tnfip3
G07	Mm.1258	NM_011609	Tnfrsf1a	Tumor necrosis factor receptor superfamily, member 1a	CD120a, FPF, TNF-R, TNF-R-I, TNF-R1, TNF-R55, TNF-alphaR1, TNFAR, TNFR60, TNFRI, TNFRp55, TNFalpha-R1, Tnfr-2, Tnfr1, p55, p55-R
G08	Mm.103551	NM_023764	Tollip	Toll interacting protein	4930403G24Rik, 4931428G15Rik
G09	Mm.264255	NM_001033161	Tradd	TNFRSF1A-associated via death domain	9130005N23Rik, AA930854
G10	Mm.292729	NM_009424	Traf6	Tnf receptor-associated factor 6	2310003F17Rik, AI851288, C630032O20Rik
G11	Mm.371667	NM_080560	Ube2n	Ubiquitin-conjugating enzyme E2N	1500026J17Rik, AL022654, BB101821, UBC13
G12	Mm.278783	NM_023230	Ube2v1	Ubiquitin-conjugating enzyme E2 variant 1	0610011J09Rik, AI256840, CROC-1, CROC1, D7Bwg1382e, UEV-1
H01	Mm.328431	NM_007393	Actb	Actin, beta	Actx, E430023M04Rik, beta-actin
H02	Mm.163	NM_009735	B2m	Beta-2 microglobulin	Ly-m11, beta2-m, beta2m
H03	Mm.343110	NM_008084	Gapdh	Glyceraldehyde-3-phosphate dehydrogenase	Gapd, MGC102544, MGC102546, MGC103190, MGC103191, MGC105239
H04	Mm.3317	NM_010368	Gusb	Glucuronidase, beta	AI747421, Gur, Gus, Gus-r, Gus-s, Gus-t, Gus-u, Gut, asd, g
H05	Mm.2180	NM_008302	Hsp90ab1	Heat shock protein 90 alpha (cytosolic), class B member 1	90kDa, AL022974, C81438, Hsp84, Hsp84-1, Hsp90, Hspcb, MGC115780
H06	N/A	SA_00106	MGDC	Mouse Genomic DNA Contamination	MIGX1B
H07	N/A	SA_00104	RTC	Reverse Transcription Control	RTC
H08	N/A	SA_00104	RTC	Reverse Transcription Control	RTC
H09	N/A	SA_00104	RTC	Reverse Transcription Control	RTC
H10	N/A	SA_00103	PPC	Positive PCR Control	PPC
H11	N/A	SA_00103	PPC	Positive PCR Control	PPC
H12	N/A	SA_00103	PPC	Positive PCR Control	PPC

## Sheet: average expression values
Symbol		Fold Change	Fold Change	Fold Change	Fold Change
	CTL	HMGB	HMGB+Prednisolone	HMGB+Salbutamol	HMGB+Prednisolone+Salbutamol
Agfg1	1	1.00933	0.951632	1.03706	0.955746
Btk	1	0.814701	0.845787	0.740454	0.815277
Casp8	1	0.820846	0.846377	0.926483	0.843799
Ccl2	1	2.52421	3.41519	1.78661	1.53548
Cd14	1	1.66545	1.52518	2.35631	3.59764
Cd80	1	1.33863	2.01127	2.60519	3.63423
Cd86	1	0.873885	1.37261	2.50805	2.53665
Cebpb	1	1.8743	3.56209	3.11947	6.92263
Chuk	1	0.905672	0.827058	0.631318	0.827974
Clec4e	1	3.42521	3.34397	5.01856	5.20158
Csf2	1	1.18743	0.866273	1.1032	1.11021
Csf3	1	352.35	330.068	823.339	1154.26
Cxcl10	1	1.98067	1.54676	0.740571	0.47905
Eif2ak2	1	0.80558	0.788976	0.811119	0.751499
Elk1	1	0.904513	0.793392	1.14191	0.887661
Fadd	1	0.685517	0.722554	0.65729	0.665933
Fos	1	0.460747	0.611801	0.427109	0.734228
Hmgb1	1	0.963553	0.977248	0.734558	0.906338
Hras1	1	0.959479	0.931719	0.940612	0.937362
Hspa1a	1	3.80919	2.31739	1.74983	1.64905
Hspd1	1	1.02536	1.03902	0.926708	1.03213
Ifnb1	1	1.45022	0.60175	1.23306	0.780778
Ifng	1	0.86318	0.666368	1.13268	0.735361
Ikbkb	1	1.06507	0.968419	1.09344	1.02898
Il10	1	48.6932	21.835	87.1711	56.5709
Il12a	1	0.86318	0.666368	1.13268	0.735361
Il1a	1	332.316	88.2454	566.651	105.891
Il1b	1	1210.98	278.572	1153.52	221.132
Il1r1	1	2.77942	2.07633	5.59938	9.92529
Il2	1	1.28314	0.565678	0.968673	0.839385
Il6	1	4.75911	2.34466	4.48416	2.17664
Il6ra	1	0.751495	1.00194	0.673105	0.98189
Irak1	1	0.933482	0.905078	0.939384	0.97595
Irak2	1	1.15927	1.40326	1.17162	1.52658
Irf1	1	0.935156	1.08753	0.580111	0.925455
Irf3	1	0.94169	0.8805	0.896156	0.851385
Jun	1	2.53988	2.1711	1.93795	1.64269
Lta	1	3.04462	1.84219	1.76524	1.27194
Ly86	1	0.896472	0.87367	0.892118	0.816081
Ly96	1	0.813633	0.760818	0.789871	0.766684
Map2k3	1	1.38477	1.22266	1.65317	1.60205
Map2k4	1	1.03108	0.979621	1.22412	1.0732
Map3k1	1	0.318404	0.385534	0.366345	0.387097
Map3k7	1	1.0412	0.983796	1.06124	1.00301
Mapk8	1	0.955896	0.863486	1.06905	0.871962
Mapk8ip3	1	0.972807	0.978854	1.07639	1.04658
Mapk9	1	0.818474	0.739114	0.860981	0.783255
Muc13	1	0.792304	0.611652	1.03967	0.67498
Myd88	1	1.09931	1.16682	1.10846	1.0193
Nfkb1	1	3.14181	2.57418	4.06828	2.97807
Nfkb2	1	2.13775	1.57684	2.66203	2.03729
Nfkbia	1	4.12327	3.5655	3.78712	3.75661
Nfkbib	1	1.52552	1.15418	1.84115	1.33872
Nfkbil1	1	1.67811	1.39212	1.33253	1.18047
Nfrkb	1	0.751036	0.715906	0.814749	0.794638
Nr2c2	1	0.645617	0.704342	0.612789	0.747364
Peli1	1	1.59416	1.35286	1.29892	1.13865
Pglyrp1	1	0.781796	0.574262	0.932995	0.890162
Ppara	1	0.89309	0.509633	1.29626	0.734628
Ptgs2	1	15.4324	1.45025	31.1209	7.65595
Rel	1	4.96191	3.7395	3.76943	2.63055
Rela	1	1.71622	1.55017	1.49439	1.4363
Ripk2	1	1.27553	1.01973	1.72108	1.0985
Tbk1	1	0.980772	1.24521	1.07289	1.2248
Ticam1	1	3.35823	2.75251	2.05031	1.6545
Ticam2	1	0.778284	0.713406	0.846688	0.696219
Tirap	1	0.815259	0.919885	0.972058	1.06673
Tlr1	1	1.2304	1.32644	0.680885	0.752847
Tlr2	1	2.03651	2.51686	1.00954	1.29588
Tlr3	1	0.751175	0.75497	0.648398	0.717819
Tlr4	1	0.454212	0.502774	0.719077	0.629974
Tlr5	1	0.793875	0.680929	0.785757	1.41697
Tlr6	1	0.71225	0.85785	0.662008	0.722507
Tlr7	1	0.901573	1.32395	0.754217	1.11278
Tlr8	1	1.34348	2.4171	2.86387	16.5916
Tlr9	1	2.24891	2.65719	1.50034	1.51848
Tnf	1	11.5781	8.30345	8.37415	4.44049
Tnfaip3	1	5.59076	7.00764	6.07114	8.56213
Tnfrsf1a	1	0.934592	0.899228	0.950699	0.945494
Tollip	1	0.96	0.886268	1.04781	0.911322
Tradd	1	0.915798	0.966042	0.896006	0.958085
Traf6	1	1.07552	1.04449	1.06278	1.06064
Ube2n	1	0.860176	0.809049	0.903668	0.950045
Ube2v1	1	0.940608	0.795139	0.89084	1.01462
Actb	1	1.15079	1.11032	1.11694	1.02084
B2m	1	0.962955	0.936003	0.954342	0.893932
Gapdh	1	0.935577	0.894036	1.02274	1.01695
Gusb	1	0.902802	1.03889	0.810656	1.02876
Hsp90ab1	1	1.06838	1.03598	1.13153	1.04743

## Sheet: gene expression MEAN+SEM
Gene	CTL	MEAN	SEM	HMGB	MEAN	SEM	HMGB+	MEAN	SEM	HMGB+	MEAN	SEM	HMGB	MEAN	SEM
Symbol							Prednisolone			Salbutamol			Prednisolone+Salbutamol
Agfg1		1	0.00820986		1.01138	0.0455877		0.952921	0.0507783		1.0376	0.0355561		0.957653	0.0614132
Btk		1	0.0491874		0.814951	0.0431406		0.843949	0.0215961		0.739684	0.0399911		0.813826	0.0309003
Casp8		1	0.0594178		0.820396	0.0445754		0.845496	0.0606407		0.926306	0.0765729		0.850125	0.125905
Ccl2		1	0.0483378		2.53344	0.199522		3.4757	0.687493		1.8056	0.288862		1.53192	0.0181556
Cd14		1	0.0853023		1.65887	0.101563		1.51721	0.107569		2.35452	0.277675		3.56983	0.00644664
Cd80		1	0.0152932		1.33923	0.0349797		2.01184	0.0648067		2.60566	0.0751167		3.67347	0.541242
Cd86		1	0.0160257		0.895128	0.143674		1.39296	0.239231		2.5074	0.00169615		2.61589	0.641551
Cebpb		1	0.101288		1.85436	0.0208436		3.54842	0.417676		3.11649	0.435573		6.97656	1.33254
Chuk		1	0.0642585		0.906205	0.0644177		0.845092	0.189863		0.632866	0.0734145		0.824478	0.0113239
Clec4e		1	0.0517745		3.42364	0.16224		3.33678	0.118441		5.01571	0.333389		5.19039	0.183751
Csf2		1	0.065861		1.18372	0.0390127		0.86331	0.0345945		1.108	0.144466		1.10903	0.0881213
Csf3		1	0.292717		322.635	5.24261		303.704	30.6664		760.144	98.7399		1062.07	107.3
Cxcl10		1	0.0271852		1.97946	0.0214313		1.5487	0.0973222		0.741231	0.0421184		0.4788	0.00973177
Eif2ak2		1	0.030838		0.806597	0.0379484		0.79011	0.0545001		0.811634	0.0456381		0.752778	0.0547148
Elk1		1	0.0508901		0.902241	0.00878651		0.792817	0.0486212		1.16088	0.224638		0.886206	0.0389883
Fadd		1	0.0320143		0.685011	0.0118323		0.723291	0.0463545		0.662067	0.0848456		0.665243	0.00118102
Fos		1	0.073929		0.458254	0.00869766		0.608586	0.0195134		0.426047	0.0345207		0.733424	0.070839
Hmgb1		1	0.07804		0.960091	0.0485774		0.983822	0.156427		0.730106	0.00451675		0.901908	0.044131
Hras1		1	0.018643		0.959394	0.015487		0.931824	0.0283637		0.940291	0.00422568		0.941889	0.0955167
Hspa1a		1	0.0325843		3.80769	0.0972856		2.32258	0.188259		1.80715	0.458638		1.65182	0.122011
Hspd1		1	0.0451596		1.0261	0.0528605		1.03907	0.0670134		0.935234	0.139177		1.0304	0.0273869
Ifnb1		1	0.253108		1.37061	0.0726653		0.569613	0.0528551		1.18068	0.20822		0.757865	0.181177
Ifng		1	0.0869113		0.869312	0.108908		0.670854	0.113895		1.16478	0.306442		0.74435	0.147626
Ikbkb		1	0.0199302		1.06472	0.00837624		0.970315	0.0664197		1.09306	0.0102819		1.02873	0.0172688
Il10		1	0.0416002		48.6605	1.63403		21.8048	0.613648		87.2929	6.94482		56.5262	2.51234
Il12a		1	0.0869113		0.869312	0.108908		0.670854	0.113895		1.16478	0.306442		0.74435	0.147626
Il1a		1	0.121441		328.088	15.9243		86.9688	2.93292		558.226	10.0292		105.096	12.9072
Il1b		1	0.213416		1161.53	13.0117		267.25	6.77294		1106.28	3.44648		212.998	19.79
Il1r1		1	0.221998		2.7071	0.406921		1.98775	0.195833		5.62867	1.79607		9.47626	0.625012
Il2		1	0.208937		1.24405	0.125285		0.561498	0.144428		1.00175	0.374379		0.857324	0.294518
Il6		1	0.143525		4.76902	0.728684		2.31238	0.264403		4.41446	0.430327		2.14656	0.244424
Il6ra		1	0.0149276		0.751657	0.0157936		1.00177	0.0111767		0.675849	0.0624828		0.981855	0.0190428
Irak1		1	0.0486041		0.93274	0.0365866		0.906911	0.0848232		0.937302	0.0163275		0.974912	0.0497977
Irak2		1	0.0244816		1.15899	0.0213879		1.40356	0.056332		1.17236	0.0579569		1.52621	0.0402942
Irf1		1	0.00803664		0.935367	0.0158602		1.08746	0.000863584		0.580127	0.00787916		0.927248	0.0585897
Irf3		1	0.0475582		0.940758	0.0329764		0.879919	0.0488164		0.900504	0.106486		0.849576	0.0103668
Jun		1	0.0607878		2.54002	0.15535		2.16989	0.175602		1.95715	0.321717		1.63767	0.0647103
Lta		1	0.075074		3.02841	0.056639		1.85579	0.297743		1.76328	0.168324		1.26489	0.0201839
Ly86		1	0.0471644		0.896626	0.0447018		0.872341	0.0343747		0.892733	0.0689077		0.828199	0.151595
Ly96		1	0.0530641		0.812373	0.0280377		0.759147	0.0251662		0.78805	0.0234016		0.765016	0.0258345
Map2k3		1	0.044371		1.38215	0.0164917		1.22037	0.0213533		1.65176	0.0803315		1.5988	0.00037802
Map2k4		1	0.0320305		1.03132	0.0359865		0.979721	0.0462197		1.22839	0.116195		1.07422	0.0672391
Map3k1		1	0.01508		0.318793	0.0122337		0.385654	0.01266		0.366303	0.00548836		0.388318	0.0318587
Map3k7		1	0.043764		1.04094	0.0420334		0.983915	0.0619481		1.05966	0.0290303		1.00153	0.0281615
Mapk8		1	0.0541088		0.953566	0.020626		0.864162	0.0741147		1.07507	0.139793		0.876377	0.11014
Mapk8ip3		1	0.0225953		0.976219	0.0611904		0.978392	0.00924934		1.0791	0.0838175		1.04906	0.0795863
Mapk9		1	0.0708583		0.818889	0.0594027		0.737221	0.0518106		0.860939	0.0858106		0.787788	0.115221
Muc13		1	0.165611		0.783021	0.098097		0.604262	0.102589		1.04916	0.276024		0.670463	0.132972
Myd88		1	0.049825		1.09959	0.0590503		1.16593	0.070038		1.11108	0.110128		1.02783	0.150982
Nfkb1		1	0.016575		3.14131	0.0337052		2.57586	0.110846		4.06889	0.118319		2.98127	0.154585
Nfkb2		1	0.0166934		2.14442	0.127172		1.58963	0.204622		2.66161	0.0411944		2.03964	0.109087
Nfkbia		1	0.03562		4.11827	0.0297087		3.56341	0.131176		3.78438	0.124821		3.75585	0.173147
Nfkbib		1	0.204184		1.6012	0.460781		1.11669	0.115752		1.79016	0.256187		1.28947	0.0560629
Nfkbil1		1	0.0369997		1.67727	0.0502249		1.39186	0.0681156		1.33156	0.0484878		1.1847	0.117809
Nfrkb		1	0.0503159		0.749314	0.0132211		0.715083	0.0385259		0.815346	0.0664845		0.794252	0.0516218
Nr2c2		1	0.0393457		0.645153	0.0186967		0.703255	0.000554824		0.612084	0.017148		0.746646	0.0254955
Peli1		1	0.0694173		1.59274	0.0977433		1.34853	0.0719231		1.29575	0.0856735		1.14215	0.14124
Pglyrp1		1	0.208904		0.747435	0.029621		0.560185	0.115411		0.931125	0.271711		0.857674	0.116585
Ppara		1	0.288301		0.83186	0.0651709		0.494745	0.149199		1.52308	0.938211		0.718139	0.23102
Ptgs2		1	0.0570025		15.3929	0.412904		2.62678	2.1933		31.0418	1.19787		7.65496	0.607814
Rel		1	0.0493372		4.95357	0.12829		3.73557	0.191217		3.76583	0.19975		2.63084	0.184795
Rela		1	0.0724501		1.70843	0.0531905		1.54357	0.0774619		1.49895	0.195397		1.43175	0.0981784
Ripk2		1	0.0660461		1.27254	0.0591287		1.01539	0.0249473		1.71623	0.101403		1.10643	0.168666
Tbk1		1	0.0638254		0.977416	0.021766		1.26817	0.264258		1.06873	0.00919435		1.22734	0.134042
Ticam1		1	0.0734592		3.3415	0.0844759		2.73714	0.0211631		2.04566	0.167525		1.64727	0.0823609
Ticam2		1	0.0568605		0.776559	0.0237979		0.715743	0.0809725		0.844308	0.0224911		0.694702	0.0308739
Tirap		1	0.0427228		0.814494	0.0238702		0.920113	0.0586451		0.972102	0.0588057		1.06483	0.00493933
Tlr1		1	0.0278882		1.24312	0.12923		1.33187	0.131173		0.680403	0.00863844		0.759989	0.108151
Tlr2		1	0.0434111		2.06454	0.244768		2.51493	0.116153		1.00854	0.0415711		1.3202	0.264149
Tlr3		1	0.0829046		0.75783	0.0915226		0.750548	0.0280999		0.644529	0.0221596		0.714877	0.0501784
Tlr4		1	0.0644156		0.453493	0.0224589		0.501627	0.0294057		0.716542	0.0220222		0.628818	0.041363
Tlr5		1	0.11087		0.820851	0.178747		0.779766	0.395377		0.803883	0.211493		1.45957	0.417479
Tlr6		1	0.0781498		0.716995	0.0772996		0.854377	0.0524393		0.664457	0.0917967		0.738567	0.172146
Tlr7		1	0.0767698		0.904297	0.0825109		1.32161	0.117964		0.750811	0.0373275		1.12853	0.222474
Tlr8		1	0.0450269		1.35123	0.121691		2.41492	0.114825		2.8603	0.113601		16.5585	0.142063
Tlr9		1	0.115354		2.21748	0.0505167		2.61943	0.0616865		1.49602	0.227554		1.49834	0.0744442
Tnf		1	0.0465046		11.5605	0.281419		8.28737	0.156927		8.35644	0.0115054		4.43113	0.0165094
Tnfaip3		1	0.102849		5.53812	0.142862		6.94592	0.350075		6.01009	0.0298285		8.50754	0.73269
Tnfrsf1a		1	0.00276103		0.935476	0.0290946		0.899239	0.00574811		0.952657	0.0611578		0.946167	0.035867
Tollip		1	0.0573376		0.957087	0.0188316		0.883337	0.0134647		1.05036	0.113384		0.90931	0.0448557
Tradd		1	0.0615574		0.914211	0.0419429		0.967641	0.100903		0.894262	0.0545481		0.956337	0.0602227
Traf6		1	0.0946391		1.06885	0.0521103		1.03721	0.0577104		1.05417	0.0299173		1.05201	0.028791
Ube2n		1	0.0319794		0.862509	0.0532108		0.808646	0.026497		0.904021	0.048252		0.951096	0.0621924
Ube2v1		1	0.0419288		0.93977	0.0277212		0.794548	0.0357589		0.889521	0.0208769		1.01285	0.00307966
Actb		1	0.0563484		1.14705	0.0077164		1.10745	0.0415889		1.11479	0.058552		1.02195	0.0955138
B2m		1	0.0561377		0.962468	0.0484091		0.93646	0.0794276		0.955175	0.0851975		0.89876	0.116739
Gapdh		1	0.0578192		0.932683	0.0118945		0.89156	0.0278232		1.0229	0.0844694		1.01396	0.0255106
Gusb		1	0.0872962		0.89851	0.0510249		1.04251	0.1563		0.812201	0.113098		1.0399	0.19903
Hsp90ab1		1	0.0701323		1.06348	0.0177307		1.03095	0.00283042		1.12627	0.0231197		1.04236	0.00564513
