# Supplementary material for: Identification of Pharmacological Modulators of HMGB1-Induced Inflammatory Response by Cell-Based Screening
Source: PLoS One. 2013 Jun 14;8(6):e65994. doi: 10.1371/journal.pone.0065994 (PMC3682954; doi:10.1371/journal.pone.0065994)
Supplement: Table S2 — A full list of the primary data produced by the primary cell-based screens. (XLS) [file pone.0065994.s002.xls]

## Sheet: HMGB screen data set
Compound Name	Library	Plate No	Row	Columns	TNF-alpha production (%)	viability (%)
Nalbuphine	NIH Clinical Collection	1	A	2	89.671	92.23
Raclopride	NIH Clinical Collection	1	B	2	98.688	94.2
Zacopride	NIH Clinical Collection	1	C	2	96.301	95.17
SKF 83566	NIH Clinical Collection	1	D	2	97.612	96.1
3'-deoxydenosine	NIH Clinical Collection	1	E	2	98.82	96.03
AM 404	NIH Clinical Collection	1	F	2	125.679	92.04
PILOCARPINE HYDROCHLORIDE	NIH Clinical Collection	1	G	2	105.486	95.43
NIFEDIPINE	NIH Clinical Collection	1	H	2	102.334	97.43
CPD000042823	NIH Clinical Collection	1	A	3	72.726	93.79
3-HYDROXY-1,2-DIMETHYL-4(1H)-PYRIDONE	NIH Clinical Collection	1	B	3	91.894	92.59
LOXAPINE SUCCINATE	NIH Clinical Collection	1	C	3	107.828	95.38
d-3-Methoxy-N-methylmorphinan hydrobromide	NIH Clinical Collection	1	D	3	83.589	96.95
Duloxetine	NIH Clinical Collection	1	E	3	100.222	91.79
Glycine, N-[2-[(acetylthio)methyl]-1-oxo-3-phenylpropyl]-,phenylmethyl ester [CAS]	NIH Clinical Collection	1	F	3	99.596	95.6
Benzeneacetic acid, 2-[(2,6-dichlorophenyl)amino]-, monosodium salt [CAS]	NIH Clinical Collection	1	G	3	112.689	97.04
PROGESTERONE	NIH Clinical Collection	1	H	3	93.91	99.81
FAMOTIDINE	NIH Clinical Collection	1	A	4	99.569	92.23
SR 57,227A	NIH Clinical Collection	1	B	4	94.855	96.1
Pancuronium	NIH Clinical Collection	1	C	4	110.556	94.39
METRONIDAZOLE	NIH Clinical Collection	1	D	4	109.038	94.78
Benzeneacetic acid, Alpha-(hydroxymethyl)-, 9-methyl-3-oxa-9-azatricyclo[3.3.1.02,4]non-7-yl ester, [7(S)-(1Alpha,2ÃƒÂ¿,4ÃƒÂ¿,5Alpha,7ÃƒÂ¿)]- [CAS]	NIH Clinical Collection	1	E	4	105.206	95.79
Benzeneacetonitrile, Alpha-[3-[[2-(3,4-dimethoxyphenyl)ethyl]methylamino]propyl]-3,4-dimethoxy-Alpha-(1-methylethyl)-, (R)- [CAS]	NIH Clinical Collection	1	F	4	105.534	96.41
Benzeneethanamine, N,Alpha-dimethyl-N-2-propynyl-(R)- [CAS]	NIH Clinical Collection	1	G	4	101.533	97.18
Capsaicin	NIH Clinical Collection	1	H	4	96.831	96.55
SALBUTAMOL SULFATE	NIH Clinical Collection	1	A	5	51.276	91.18
(Â±)-Vesamicol hydrochloride	NIH Clinical Collection	1	B	5	85.902	96.59
Picrotin - Picrotoxinin	NIH Clinical Collection	1	C	5	102.334	96.15
Terazosin	NIH Clinical Collection	1	D	5	98.212	95.18
diphenylcyclopropenone	NIH Clinical Collection	1	E	5	114.192	70.79
4-Thiazolidinecarboxylic acid, 2-oxo-, (R)- [CAS]	NIH Clinical Collection	1	F	5	105.39	93.25
Mesoridazine	NIH Clinical Collection	1	G	5	107.178	96.85
3(2H)-Pyridazinone, 6-[4-(difluoromethoxy)-3-methoxyphenyl]- [CAS]	NIH Clinical Collection	1	H	5	94.615	92.52
10H-Phenothiazine, 2-chloro-10-[3-(4-methyl-1-piperazinyl)propyl- [CAS]	NIH Clinical Collection	1	A	6	92.489	92.4
1H-Cyclopenta[b]quinolin-9-amine, 2,3,5,6,7,8-hexahydro-, monohydrochloride- [CAS]	NIH Clinical Collection	1	B	6	104.816	95.67
CLOTRIMAZOLE	NIH Clinical Collection	1	C	6	85.204	98.52
LORATADINE	NIH Clinical Collection	1	D	6	106.337	98
PHENELZINE SULFATE SALT	NIH Clinical Collection	1	E	6	101.641	101.3
Riluzole	NIH Clinical Collection	1	F	6	101.191	96.83
Naltrindole	NIH Clinical Collection	1	G	6	106.021	98.34
Nornicotine	NIH Clinical Collection	1	H	6	109.631	98.44
Bifemelane	NIH Clinical Collection	1	A	7	80.479	94.44
CGS 15943	NIH Clinical Collection	1	B	7	103.354	94.09
Cinanserin	NIH Clinical Collection	1	C	7	108.411	100.37
Cisapride	NIH Clinical Collection	1	D	7	103.578	97.21
Indatraline	NIH Clinical Collection	1	E	7	121.272	89.95
TRAZODONE HYDROCHLORIDE	NIH Clinical Collection	1	F	7	105.349	97.53
Prazosin	NIH Clinical Collection	1	G	7	105.383	95.62
URAPIDIL HYDROCHLORIDE	NIH Clinical Collection	1	H	7	107.572	96.97
(-)-Cotinine	NIH Clinical Collection	1	A	8	97.356	93.86
D-CYCLOSERINE	NIH Clinical Collection	1	B	8	111.853	97.01
Fluvoxamine	NIH Clinical Collection	1	C	8	104.427	98.36
Doxepin	NIH Clinical Collection	1	D	8	104.475	101.81
TRIFLUOPERAZINE DIHYDROCHLORIDE	NIH Clinical Collection	1	E	8	110.577	97.48
(+)-3-HYDROXY-N-METHYLMORPHINAN D-TARTRATE	NIH Clinical Collection	1	F	8	111.599	100.57
L-Ornithine, N5-[imino(methylamino)methyl]-[CAS]	NIH Clinical Collection	1	G	8	102.327	101.26
Maprotilline HCl	NIH Clinical Collection	1	H	8	104.802	94.55
Pizotyline	NIH Clinical Collection	1	A	9	94.376	93.22
BETA-ESTRADIOL	NIH Clinical Collection	1	B	9	106.943	98.83
N,N'-DIACETYL-1,6-DIAMINOHEXANE	NIH Clinical Collection	1	C	9	117.306	100.07
DIPHENHYDRAMINE HYDROCHLORIDE	NIH Clinical Collection	1	D	9	111.422	98.05
Galanthamine	NIH Clinical Collection	1	E	9	103.544	95.2
Ifenprodil	NIH Clinical Collection	1	F	9	106.262	99.07
TETRAETHYLTHIURAM DISULFIDE	NIH Clinical Collection	1	G	9	92.131	100.09
Piribedil	NIH Clinical Collection	1	H	9	110.395	99.95
KETOCONAZOLE	NIH Clinical Collection	1	A	10	109.456	97.35
TRIPELENNAMINE HYDROCHLORIDE	NIH Clinical Collection	1	B	10	111.938	94.42
Pyrazinecarboxamide, 3,5-diamino-N-(aminoiminomethyl)-6-chloro- [CAS]	NIH Clinical Collection	1	C	10	107.164	95.29
9-AMINO-1,2,3,4-TETRAHYDROACRIDINE HYDROCHLORIDE	NIH Clinical Collection	1	D	10	107.628	97.75
ETHYNYLESTRADIOL	NIH Clinical Collection	1	E	10	99.995	100.13
2(1H)-Pyrimidinone, 4-amino-1-ÃƒÂ¿-D-arabinofuranosyl- [CAS]	NIH Clinical Collection	1	F	10	106.303	87.58
L-Glutamic acid, N-[4-[[(2,4-diamino-6-pteridinyl)methyl]methylamino]benzoyl]- [CAS]	NIH Clinical Collection	1	G	10	99.922	94.04
TFMPP	NIH Clinical Collection	1	H	10	101.05	99.42
Pramipexole	NIH Clinical Collection	1	A	11	111.274	95.35
LIDOCAINE	NIH Clinical Collection	1	B	11	111.867	99.59
Indomethacin	NIH Clinical Collection	1	C	11	103.686	105.07
LY 171883	NIH Clinical Collection	1	D	11	102.84	100.65
Paroxetine	NIH Clinical Collection	1	E	11	100.977	93.17
Epigallocatechin gallate	NIH Clinical Collection	1	F	11	107.323	99.96
5-Amino-2-hydroxy-benzoic acid	NIH Clinical Collection	1	G	11	106.158	97.87
Oxiranecarboxylic acid, 2-[6-(4-chlorophenoxy)hexyl]-, ethyl ester- [CAS]	NIH Clinical Collection	1	H	11	93.943	100.21
Cephalexin monohydrate	NIH Clinical Collection	2	A	2	98.328	93.88
PIDOTIMOD	NIH Clinical Collection	2	B	2	88.557	100.99
RAMIPRIL	NIH Clinical Collection	2	C	2	92.882	98.95
LEVOFLOXACIN	NIH Clinical Collection	2	D	2	103.781	99.61
19-Nortestosterone	NIH Clinical Collection	2	E	2	89.488	103.24
NIZATIDINE	NIH Clinical Collection	2	F	2	105.638	99.28
5-FLUOROCYTOSINE	NIH Clinical Collection	2	G	2	95.312	100.15
Trileptal	NIH Clinical Collection	2	H	2	103.876	97.85
TROXIPIDE	NIH Clinical Collection	2	A	3	138.747	87.77
ACTARIT	NIH Clinical Collection	2	B	3	107.028	92.21
AZELASTINE HCl	NIH Clinical Collection	2	C	3	111.879	95.35
TOCAINIDE	NIH Clinical Collection	2	D	3	101.324	93.89
TAXIFOLIN-(+/-)	NIH Clinical Collection	2	E	3	108.046	98.27
FENPIVERINIUM BROMIDE	NIH Clinical Collection	2	F	3	102.643	98.44
CEFATRIZINE PROPYLENE GLYCOL	NIH Clinical Collection	2	G	3	112.595	96.14
IDEBENONE	NIH Clinical Collection	2	H	3	106.897	93.98
LEVOSULPIRIDE	NIH Clinical Collection	2	A	4	105.008	92.4
Pemoline	NIH Clinical Collection	2	B	4	97.958	96.16
LETROZOL	NIH Clinical Collection	2	C	4	103.333	96.08
MEROPENEM	NIH Clinical Collection	2	D	4	107.879	95.59
ORLISTAT	NIH Clinical Collection	2	E	4	103.571	96.75
ONDANSETRON HCl	NIH Clinical Collection	2	F	4	110.49	99.5
LEVONORGESTREL	NIH Clinical Collection	2	G	4	106.552	99.58
CETRAXATE HCl	NIH Clinical Collection	2	H	4	104.326	97.72
Alprazolam	NIH Clinical Collection	2	A	5	96.205	89.82
LAMOTRIGINE	NIH Clinical Collection	2	B	5	105.425	96.74
CROTAMITON	NIH Clinical Collection	2	C	5	113.043	97.77
AMFEBUTAMONE HCl	NIH Clinical Collection	2	D	5	98.579	98.33
ALFUZOSIN	NIH Clinical Collection	2	E	5	114.156	98.7
Amisulpride	NIH Clinical Collection	2	F	5	111.279	97.41
LOFEPRAMINE	NIH Clinical Collection	2	G	5	119.852	99.98
PEROSPIRONE HCl	NIH Clinical Collection	2	H	5	106.284	96.74
DOCETAXEL	NIH Clinical Collection	2	A	6	104.033	92.09
HONOKIOL	NIH Clinical Collection	2	B	6	85.363	97.3
TOLTERODINE TARTRATE	NIH Clinical Collection	2	C	6	112.226	98.39
CARMOFUR	NIH Clinical Collection	2	D	6	114.751	98.49
METHYL PAROXETINE	NIH Clinical Collection	2	E	6	107.879	97.36
OLMESARTAN MEDOXOMIL	NIH Clinical Collection	2	F	6	101.834	99.08
LOSARTAN Potassium	NIH Clinical Collection	2	G	6	120.398	100.44
TEMOZOLOMIDE	NIH Clinical Collection	2	H	6	125.371	97.04
Methyltestosterone	NIH Clinical Collection	2	A	7	100.113	91.93
TOSUFLOXACIN TOSYLATE	NIH Clinical Collection	2	B	7	93.415	94.46
MECILLINAM	NIH Clinical Collection	2	C	7	126.888	96.98
ATOMEXETINE HCl	NIH Clinical Collection	2	D	7	108.24	84.41
ARTESUNATE	NIH Clinical Collection	2	E	7	121.226	73.59
ITRACONAZOLE	NIH Clinical Collection	2	F	7	143.154	79.12
CEFPODOXIME PROXETIL	NIH Clinical Collection	2	G	7	106.593	100.15
BUFLOMEDIL HYDROCHLORIDE	NIH Clinical Collection	2	H	7	122.116	97.69
4-Chloro-N-(2-morpholin-4-yl-ethyl)-benzamide	NIH Clinical Collection	2	A	8	118.189	93.22
HALOMETASONE MONOHYDRATE	NIH Clinical Collection	2	B	8	39.491	105.94
TRICLABENDAZOLE	NIH Clinical Collection	2	C	8	100.133	97.63
ROFECOXIB	NIH Clinical Collection	2	D	8	104.237	98.67
BISOPROLOL FUMARATE	NIH Clinical Collection	2	E	8	103.904	97.01
EZETIMIBE	NIH Clinical Collection	2	F	8	107.969	98.8
TIAGABINE HCl	NIH Clinical Collection	2	G	8	120.671	98.82
IDARUBICIN HCl	NIH Clinical Collection	2	H	8	6.065	2.08
FLUBENDAZOLE	NIH Clinical Collection	2	A	9	125.355	76.68
TACROLIMUS	NIH Clinical Collection	2	B	9	66.197	103.9
VALACICLOVIR HYDROCHLORIDE	NIH Clinical Collection	2	C	9	112.936	98.06
CLARITHROMYCIN	NIH Clinical Collection	2	D	9	103.32	101.53
ARIPIPRAZOLE	NIH Clinical Collection	2	E	9	101.015	93.86
TRIMEBUTINE MALEATE	NIH Clinical Collection	2	F	9	107.99	99.97
Mestanolone	NIH Clinical Collection	2	G	9	114.443	97.03
NISOLDIPINE	NIH Clinical Collection	2	H	9	92.343	98.19
PICEID	NIH Clinical Collection	2	A	10	103.157	96.49
1-(2-Methyl-5-nitro-imidazol-1-yl)-propan-2-ol	NIH Clinical Collection	2	B	10	107.713	99.93
NIFEKALANT HCl	NIH Clinical Collection	2	C	10	113.977	96.65
NATEGLINIDE	NIH Clinical Collection	2	D	10	109.593	98.04
MEGESTROL ACETATE	NIH Clinical Collection	2	E	10	114.873	100.92
ORMETOPRIM	NIH Clinical Collection	2	F	10	101.633	95.36
ZILEUTON	NIH Clinical Collection	2	G	10	111.632	96.32
STAVUDINE	NIH Clinical Collection	2	H	10	97.451	97.17
GABEXATE MESYLATE	NIH Clinical Collection	2	A	11	100.013	100.86
OXICONAZOLE NITRATE	NIH Clinical Collection	2	B	11	100.607	108.78
KITASAMYCIN	NIH Clinical Collection	2	C	11	118.744	101.97
FAMCICLOVIR	NIH Clinical Collection	2	D	11	113.143	101.62
(Â±)-Sotalol hydrochloride	NIH Clinical Collection	2	E	11	96.794	100.67
RUFLOXACIN HCl	NIH Clinical Collection	2	F	11	101.163	101.68
TAXIFOLIN-(+)	NIH Clinical Collection	2	G	11	106.566	99.73
ALOSETRON HCl	NIH Clinical Collection	2	H	11	100.574	99.24
BUPROPION HYDROCHLORIDE	NIH Clinical Collection	3	A	2	95.799	86.96
IRSOGLADINE MALEATE	NIH Clinical Collection	3	B	2	90.609	92.86
ACARBOSE	NIH Clinical Collection	3	C	2	94.618	94.22
BENPROPERINE PHOSPHATE	NIH Clinical Collection	3	D	2	93.58	89.31
PHENPROBAMATE	NIH Clinical Collection	3	E	2	92.266	94.23
MEMANTINE HYDROCHLORIDE	NIH Clinical Collection	3	F	2	94.202	92.17
Carvedilol	NIH Clinical Collection	3	G	2	91.094	90.4
LOMIFYLLINE	NIH Clinical Collection	3	H	2	97.039	91.57
PAZUFLOXACIN	NIH Clinical Collection	3	A	3	92.877	89.07
MIGLITOL	NIH Clinical Collection	3	B	3	93.548	91.35
TRANILAST	NIH Clinical Collection	3	C	3	103.708	90.35
OLANZAPINE	NIH Clinical Collection	3	D	3	93.794	91.43
Nefazodone	NIH Clinical Collection	3	E	3	93.6	92.77
MOXIFLOXACIN HCl	NIH Clinical Collection	3	F	3	93.509	92.62
NELFINAVIR MESYLATE	NIH Clinical Collection	3	G	3	98.552	89.72
PRAVASTATIN Sodium	NIH Clinical Collection	3	H	3	102.906	93.57
TOPOTECAN HCL	NIH Clinical Collection	3	A	4	94.358	48.59
LEVETIRACETAM	NIH Clinical Collection	3	B	4	91.855	85.44
PRAMIPEXOLE HCl	NIH Clinical Collection	3	C	4	99.991	89.99
RISPERIDONE	NIH Clinical Collection	3	D	4	96.309	89.53
PIOGLITAZONE HCl	NIH Clinical Collection	3	E	4	110.216	81.88
CILASTATIN Na	NIH Clinical Collection	3	F	4	93.335	89.7
ARGATROBAN	NIH Clinical Collection	3	G	4	95.23	92.76
VALDECOXIB	NIH Clinical Collection	3	H	4	83.957	92.66
NAFTOPIDIL	NIH Clinical Collection	3	A	5	84.019	88.65
Nobiletin	NIH Clinical Collection	3	B	5	99.064	87.68
FINASTERIDE	NIH Clinical Collection	3	C	5	102.588	94.47
ZOLPIDEM TARTRATE	NIH Clinical Collection	3	D	5	108.074	93.65
Viramune	NIH Clinical Collection	3	E	5	100.345	95.31
TOPIRAMATE	NIH Clinical Collection	3	F	5	99.037	94.68
VORICONAZOLE	NIH Clinical Collection	3	G	5	99.79	93.68
FENOLDOPAM MESYLATE	NIH Clinical Collection	3	H	5	97.177	92.06
ROSIGLITAZONE MALEATE	NIH Clinical Collection	3	A	6	100.218	104.9
ESCITALOPRAM OXALATE	NIH Clinical Collection	3	B	6	90.335	100.68
ZERANOL	NIH Clinical Collection	3	C	6	95.74	100.24
LATANOPROST	NIH Clinical Collection	3	D	6	88.942	96.45
2',3'-DIDEOXYINOSINE	NIH Clinical Collection	3	E	6	98.274	99.56
Sertraline	NIH Clinical Collection	3	F	6	110.392	91.87
CALCIPOTRIOL	NIH Clinical Collection	3	G	6	94.95	102.86
EPIRUBICIN HYDROCHLORIDE	NIH Clinical Collection	3	H	6	11.502	1.75
BICALUTAMIDE	NIH Clinical Collection	3	A	7	91.011	90.26
BENIDIPINE HCl	NIH Clinical Collection	3	B	7	99.051	95.35
AMLEXANOX	NIH Clinical Collection	3	C	7	98.552	92.33
CERIVASTATIN Na	NIH Clinical Collection	3	D	7	?????	100.27
ICARIIN	NIH Clinical Collection	3	E	7	102.642	87.94
METHYLANDROSTENEDIOL	NIH Clinical Collection	3	F	7	101.568	94.82
TRIPTOLIDE	NIH Clinical Collection	3	G	7	0.053	2.31
ROSIGLTAZONE HCl	NIH Clinical Collection	3	H	7	114.281	99.47
FTORAFUR	NIH Clinical Collection	3	A	8	88.418	87.78
OLIGOMYCIN C	NIH Clinical Collection	3	B	8	93.199	84.17
BENAZEPRIL HCl	NIH Clinical Collection	3	C	8	109.373	88.95
Oxymetholone	NIH Clinical Collection	3	D	8	105.707	104.34
IPRIFLAVONE	NIH Clinical Collection	3	E	8	107.65	97.13
OXAPROZIN	NIH Clinical Collection	3	F	8	94.729	87.24
ROLIPRAM	NIH Clinical Collection	3	G	8	59.897	86.04
MOSAPRIDE CITRATE	NIH Clinical Collection	3	H	8	94.911	89.05
ISOQUERCETRIN	NIH Clinical Collection	3	A	9	101.703	96.12
FLUMAZENIL	NIH Clinical Collection	3	B	9	101.851	98.11
OZAGREL HCl	NIH Clinical Collection	3	C	9	103.389	97.44
HYPEROSIDE	NIH Clinical Collection	3	D	9	105.673	98.05
RIFABUTIN	NIH Clinical Collection	3	E	9	106.431	102.05
ESMOLOL HYDROCHLORIDE	NIH Clinical Collection	3	F	9	98.446	101.55
TADALAFIL	NIH Clinical Collection	3	G	9	48.931	107.04
Modafinil	NIH Clinical Collection	3	H	9	94.248	100.16
DOXORUBICIN HYDROCHLORIDE	NIH Clinical Collection	3	A	10	45.006	3.64
MOXONIDINE HCl	NIH Clinical Collection	3	B	10	104.008	90.4
Nitrazepam	NIH Clinical Collection	3	C	10	91.298	93.19
PEFLOXACIN MESYLATE	NIH Clinical Collection	3	D	10	105.274	89.96
VENLAFAXINE HCl	NIH Clinical Collection	3	E	10	100.212	94.42
PANTOPRAZOLE SODIUM SALT	NIH Clinical Collection	3	F	10	96.205	91.98
FLUTICASONE PROPIONATE	NIH Clinical Collection	3	G	10	40.305	93.41
INDINAVIR SULPHATE	NIH Clinical Collection	3	H	10	43.239	95.5
MIDAZOLAM HCl	NIH Clinical Collection	3	A	11	101.312	90.53
LAMIVUDINE	NIH Clinical Collection	3	B	11	101.11	92.95
PROCARBAZINE HCl	NIH Clinical Collection	3	C	11	100.801	93.64
ESOMEPRAZOLE Mg	NIH Clinical Collection	3	D	11	91.317	91.9
SULFASALAZINE	NIH Clinical Collection	3	E	11	101.406	93.37
TORASEMIDE	NIH Clinical Collection	3	F	11	94.287	92.14
TROPISETRON HCl	NIH Clinical Collection	3	G	11	46.384	98.75
Ranolazine dihydrochloride	NIH Clinical Collection	3	H	11	105.714	94.38
NITRENDIPINE	NIH Clinical Collection	4	A	2	109.038	94.28
SAQUINAVIR MESYLATE	NIH Clinical Collection	4	B	2	103.666	99.73
BIFONAZOLE	NIH Clinical Collection	4	C	2	92.26	102.35
SUMATRIPTAN SUCCINATE	NIH Clinical Collection	4	D	2	110.185	95.02
EXEMESTANE	NIH Clinical Collection	4	E	2	87.157	103.27
NITAZOXANIDE	NIH Clinical Collection	4	F	2	106.886	94
Diazepam	NIH Clinical Collection	4	G	2	103.63	93.27
QUETIAPINE HEMIFUMARATE	NIH Clinical Collection	4	H	2	107.637	95.82
RUTIN	NIH Clinical Collection	4	A	3	101.694	97.39
PENCICLOVIR	NIH Clinical Collection	4	B	3	105.055	97.5
CALCITRIOL	NIH Clinical Collection	4	C	3	92.96	98.11
DIPHENOXYLATE	NIH Clinical Collection	4	D	3	93.271	99.73
Felbamate	NIH Clinical Collection	4	E	3	96.965	96.43
DROPERIDOL	NIH Clinical Collection	4	F	3	101.905	96.17
Pentoxifylline	NIH Clinical Collection	4	G	3	110.353	92.86
TORADOL	NIH Clinical Collection	4	H	3	105.85	93.99
RITONAVIR	NIH Clinical Collection	4	A	4	111.573	98.41
VINORELBINE BITATRATE	NIH Clinical Collection	4	B	4	112.186	78.16
LINEZOLIDE	NIH Clinical Collection	4	C	4	84.74	100.72
LOMERIZINE DiHCl	NIH Clinical Collection	4	D	4	94.097	95.76
EFAVIRENZ	NIH Clinical Collection	4	E	4	86.803	93.76
IRBESARTAN	NIH Clinical Collection	4	F	4	69.27	98.47
REPAGLINIDE	NIH Clinical Collection	4	G	4	117.067	87.93
Ethylestrenol	NIH Clinical Collection	4	H	4	103.07	98.43
PTEROSTILBENE	NIH Clinical Collection	4	A	5	92.549	90
ROXATIDINE ACETATE HCl	NIH Clinical Collection	4	B	5	96.861	99.66
DEXBROMPHENIRAMINE MALEATE	NIH Clinical Collection	4	C	5	109.753	100.15
ANAGRELIDE HCl	NIH Clinical Collection	4	D	5	109.556	90.35
TEGASEROD MALEATE	NIH Clinical Collection	4	E	5	96.127	97.31
MILRINONE	NIH Clinical Collection	4	F	5	120.796	94.13
LEVOCETIRIZINE	NIH Clinical Collection	4	G	5	115.29	95.44
Citalopram hydrobromide	NIH Clinical Collection	4	H	5	96.697	97.77
TICLOPIDINE HCl	NIH Clinical Collection	4	A	6	87.045	96.51
LOXOPROFEN SODIUM	NIH Clinical Collection	4	B	6	118.737	98.39
ZAFIRLUKAST	NIH Clinical Collection	4	C	6	130.778	96.25
TERBINAFINE HCl	NIH Clinical Collection	4	D	6	112.208	97.65
ISRADIPINE	NIH Clinical Collection	4	E	6	107.861	94.04
VALSARTAN	NIH Clinical Collection	4	F	6	98.927	92.69
Piroxicam	NIH Clinical Collection	4	G	6	118.516	95.12
GLYCOPYRROLATE	NIH Clinical Collection	4	H	6	110.031	94.18
Physostigmine	NIH Clinical Collection	4	A	7	102.646	98.18
LOBELINE HYDROCHLORIDE	NIH Clinical Collection	4	B	7	110.177	98.91
DOXYLAMINE SUCCINATE	NIH Clinical Collection	4	C	7	113.572	97.72
Milnacipran	NIH Clinical Collection	4	D	7	105.535	94.82
5-fluoro-2-pyrimidone	NIH Clinical Collection	4	E	7	107.203	99.04
Chlorpheniramine	NIH Clinical Collection	4	F	7	113.498	95.18
DOFETILIDE	NIH Clinical Collection	4	G	7	111.227	96.16
FORMOTEROL FUMARATE DIHYDRATE	NIH Clinical Collection	4	H	7	70.471	93.9
RIZATRIPTAN BENZOATE	NIH Clinical Collection	4	A	8	70.857	102.62
RIFAPENTINE	NIH Clinical Collection	4	B	8	91.429	99.58
LOTEPREDNOL ETABONATE	NIH Clinical Collection	4	C	8	58.957	103.93
ENALAPRILAT	NIH Clinical Collection	4	D	8	116.184	95.33
Donepezil	NIH Clinical Collection	4	E	8	101.286	98.34
Nimetazepam	NIH Clinical Collection	4	F	8	109.395	94.52
NICORANDIL	NIH Clinical Collection	4	G	8	111.691	96.98
TELMISARTAN	NIH Clinical Collection	4	H	8	78.8	93.61
ITOPRIDE HCl	NIH Clinical Collection	4	A	9	121.937	101.25
RIFAXIMIN	NIH Clinical Collection	4	B	9	99.908	97.22
MONTELUKAST Na	NIH Clinical Collection	4	C	9	92.954	103.15
2',3'-DIDEOXYCYTIDINE	NIH Clinical Collection	4	D	9	108.594	97.11
1H-Imidazol-2-amine, N-(2,6-dichlorophenyl)-4,5-dihydro- [CAS]	NIH Clinical Collection	4	E	9	103.758	95.2
6H-Pyrido[2,3-b][1,4]benzodiazepin-6-one, 11-[[2-[(diethylamino)methyl]-1-piperidinyl]acetyl]-5,11-dihydro- [CAS]	NIH Clinical Collection	4	F	9	107.536	97.6
1H-Indole-2-propanoic acid, 1-[(4-chlorophenyl)methyl]-3-[(1,1-dimethylethyl)thio]-Alpha,Alpha-dimethyl-5-(1-methylethyl)- [CAS]	NIH Clinical Collection	4	G	9	99.052	89.48
1H-Imidazole-5-carboxylic acid, 1-(1-phenylethyl)-, ethyl ester, (R)- [CAS]	NIH Clinical Collection	4	H	9	95.696	93.01
Acetamide, 2-amino-N-(1-methyl-1,2-diphenylethyl)-, (+/-)- [CAS]	NIH Clinical Collection	4	A	10	101.209	100.62
Altanserin	NIH Clinical Collection	4	B	10	107.138	101.41
BETAXOLOL HYDROCHLORIDE	NIH Clinical Collection	4	C	10	110.5	98.13
INDARUBICIN	NIH Clinical Collection	4	D	10	100.075	71.99
Azasetron	NIH Clinical Collection	4	E	10	103.304	98.19
GR 89696	NIH Clinical Collection	4	F	10	102.815	96.31
DELTA1-HYDROCORTISONE 21-HEMISUCCINATE SODIUM SALT	NIH Clinical Collection	4	G	10	88.828	100.11
DIAZOXIDE	NIH Clinical Collection	4	H	10	97.626	93.61
2-CHLOROADENOSINE	NIH Clinical Collection	4	A	11	110.148	94.68
ORNIDAZOLE	NIH Clinical Collection	4	B	11	110.544	99.84
1,1-DIMETHYL-4-PHENYLPIPERAZINIUM IODIDE	NIH Clinical Collection	4	C	11	116.954	101.36
PIRENPERONE	NIH Clinical Collection	4	D	11	107.854	99.91
MESTRANOL	NIH Clinical Collection	4	E	11	114.931	100.19
2-(2-AMINOETHYL)PYRIDINE	NIH Clinical Collection	4	F	11	107.521	97.18
BENACTYZINE HYDROCHLORIDE	NIH Clinical Collection	4	G	11	114.878	97.12
DICHLOROACETIC ACID	NIH Clinical Collection	4	H	11	105.929	95.93
BESTATIN	NIH Clinical Collection	5	A	2	97.542	98.19
TOREMIFENE CITRATE	NIH Clinical Collection	5	B	2	90.087	103.25
GOSERELIN ACETATE	NIH Clinical Collection	5	C	2	93.461	98.13
SECOISOLARICIRESINOL	NIH Clinical Collection	5	D	2	96.966	98.19
RALTITREXED	NIH Clinical Collection	5	E	2	94.676	97.9
DOXAPRAM HYDROCHLORIDE	NIH Clinical Collection	5	F	2	103.455	96.9
RU 24969	NIH Clinical Collection	5	G	2	93.035	99.52
Brucine	NIH Clinical Collection	5	H	2	98.373	92.09
TRYPTOLINE	NIH Clinical Collection	5	A	3	97.549	98.01
FLUPHENAZINE HYDROCHLORIDE	NIH Clinical Collection	5	B	3	97.624	92.88
PALONOSETRON HCl	NIH Clinical Collection	5	C	3	98.844	100.81
NAPROXEN SODIUM	NIH Clinical Collection	5	D	3	98.926	98.73
MEPIVACAINE HYDROCHLORIDE	NIH Clinical Collection	5	E	3	99.398	100.82
3-[3,5-DIBROMO-4-HYDROXYBENZOYL]-2-ETHYLBENZOFURAN	NIH Clinical Collection	5	F	3	97.57	93.81
NIMODIPINE	NIH Clinical Collection	5	G	3	111.116	94.62
ROLITETRACYCLINE	NIH Clinical Collection	5	H	3	105.027	93.11
MEPIRIZOLE	NIH Clinical Collection	5	A	4	103.833	95.84
6-AZAURIDINE	NIH Clinical Collection	5	B	4	78.023	87.08
ReichsteinÂ’s substanceÂ S	NIH Clinical Collection	5	C	4	90.598	98.18
3-PYRIDINEMETHANOL	NIH Clinical Collection	5	D	4	110.457	97.04
Haloperidol	NIH Clinical Collection	5	E	4	112.915	87.83
Stiripentol	NIH Clinical Collection	5	F	4	97.78	92.64
Fluperlapine	NIH Clinical Collection	5	G	4	100.113	92.55
OXYPHENONIUM BROMIDE	NIH Clinical Collection	5	H	4	97.4	92.76
Homoveratrylamine	NIH Clinical Collection	5	A	5	93.994	96.41
TINIDAZOLE	NIH Clinical Collection	5	B	5	85.141	101.52
XANTHINOL NICOTINATE	NIH Clinical Collection	5	C	5	107.386	100.4
SYNEPHRINE	NIH Clinical Collection	5	D	5	93.288	96.87
RESVERATROL	NIH Clinical Collection	5	E	5	118.389	98.83
MALTOL	NIH Clinical Collection	5	F	5	114.899	96.72
6-AMINOINDAZOLE	NIH Clinical Collection	5	G	5	98.988	95.4
ENROFLOXACIN	NIH Clinical Collection	5	H	5	107.272	91.69
DEHYDROCHOLIC ACID	NIH Clinical Collection	5	A	6	100.374	99.01
CEFACLOR	NIH Clinical Collection	5	B	6	106.079	102.78
1-BENZYLIMIDAZOLE	NIH Clinical Collection	5	C	6	113.603	100.68
DULOXETINE HCl	NIH Clinical Collection	5	D	6	108.701	92.99
VARDENAFIL CITRATE	NIH Clinical Collection	5	E	6	106.817	98.84
ROPIVACAINE HCl	NIH Clinical Collection	5	F	6	100.947	95.36
ANASTROZOLE	NIH Clinical Collection	5	G	6	106.533	93.75
KETOTIFEN FUMARATE	NIH Clinical Collection	5	H	6	105.57	91.7
MEDROXYPROGESTERONE	NIH Clinical Collection	5	A	7	90.12	104.11
Pinacidil monohydrate	NIH Clinical Collection	5	B	7	105.577	102.33
7-NITROINDAZOLE	NIH Clinical Collection	5	C	7	106.355	99.94
5-Methoxytryptamine	NIH Clinical Collection	5	D	7	108.414	100.22
PHENOTHIAZINE	NIH Clinical Collection	5	E	7	109.455	101.84
2-CHLORO-2'-DEOXYADENOSINE	NIH Clinical Collection	5	F	7	109.721	83.8
GRANISETRON HCl	NIH Clinical Collection	5	G	7	102.138	93.99
Rimcazole	NIH Clinical Collection	5	H	7	106.618	93.19
Nafadotride	NIH Clinical Collection	5	A	8	100.409	104.44
DESOXIMETASONE	NIH Clinical Collection	5	B	8	52.369	108.31
DEXCHLORPHENIRAMINE MALEATE	NIH Clinical Collection	5	C	8	108.572	102.87
Guanidine, N-cyano-N'-(1,1-dimethylpropyl)-N''-3-pyridinyl- [CAS]	NIH Clinical Collection	5	D	8	118.419	101.38
L-694,247	NIH Clinical Collection	5	E	8	108.923	101.26
AM-251	NIH Clinical Collection	5	F	8	109.909	101.39
HTMT	NIH Clinical Collection	5	G	8	94.488	97.11
Benzo[a]phenanthridine-10,11-diol, 5,6,6a,7,8,12b-hexahydro-, trans- [CAS]	NIH Clinical Collection	5	H	8	112.272	86.63
Methanesulfonamide, N-[4-[[1-[2-(6-methyl-2-pyridinyl)ethyl]-4-piperidinyl]carbonyl]phenyl]-, dihydrochloride [CAS]	NIH Clinical Collection	5	A	9	95.233	100.16
2H-Indol-2-one, 1,3-dihydro-1-phenyl-3,3-bis(4-pyridinylmethyl)- [CAS]	NIH Clinical Collection	5	B	9	70.44	106.7
Beclomethasone	NIH Clinical Collection	5	C	9	54.22	108.42
OMEPRAZOLE	NIH Clinical Collection	5	D	9	112.447	99.63
DOLASETRON MESYLATE	NIH Clinical Collection	5	E	9	110.457	100.13
Zolmitriptan	NIH Clinical Collection	5	F	9	106.895	97.7
TREMULACIN	NIH Clinical Collection	5	G	9	107.065	96.81
DACTINOMYCIN	NIH Clinical Collection	5	H	9	1.272	1.11
Tramadol	NIH Clinical Collection	5	A	10	109.361	102.57
CHLORDIAZEPOXIDE	NIH Clinical Collection	5	B	10	98.639	105.12
CEFIXIME TRIHYDRATE	NIH Clinical Collection	5	C	10	83.861	105.84
CEFDINIR	NIH Clinical Collection	5	D	10	107.407	103.56
LOFEXIDINE HCl	NIH Clinical Collection	5	E	10	102.256	102.28
BALSALAZIDE	NIH Clinical Collection	5	F	10	89.381	97.03
OLOPATADINE HCl	NIH Clinical Collection	5	G	10	101.611	98.35
ITAVASTATIN Ca	NIH Clinical Collection	5	H	10	163.115	105.22
CORTISONE	NIH Clinical Collection	5	A	11	116.321	102.6
CYPROHEPTADINE HYDROCHLORIDE	NIH Clinical Collection	5	B	11	108.171	100.78
HOMOHARRINGTONINE	NIH Clinical Collection	5	C	11	-1.824	1.33
CORTICOSTERONE	NIH Clinical Collection	5	D	11	64.188	105.7
VECURONIUM BROMIDE	NIH Clinical Collection	5	E	11	102.291	100.64
TIBOLONE	NIH Clinical Collection	5	F	11	96.155	98.33
NICOTINAMIDE	NIH Clinical Collection	5	G	11	101.438	96.05
NIALAMIDE	NIH Clinical Collection	5	H	11	107.778	94.52
VINDESINE SULFATE	NIH Clinical Collection	6	A	2	120.001	68.81
VINCRISTINE SULFATE	NIH Clinical Collection	6	B	2	130.411	72.05
LACIDIPINE	NIH Clinical Collection	6	C	2	100.276	99.34
MIRTAZAPINE	NIH Clinical Collection	6	D	2	100.016	98.8
AMPIROXICAM	NIH Clinical Collection	6	E	2	90.152	99.87
GLIMEPIRIDE	NIH Clinical Collection	6	F	2	90.361	96.41
AMLODIPINE BASE	NIH Clinical Collection	6	G	2	92.377	94.58
RABEPRAZOLE	NIH Clinical Collection	6	H	2	105.207	93.89
CLOFAZIMINE	NIH Clinical Collection	6	A	3	92.22	92.6
IRINOTECAN HCl )trihydrate)	NIH Clinical Collection	6	B	3	97.76	94.56
LANSOPRAZOLE	NIH Clinical Collection	6	C	3	81.506	97.95
8-Chloro-11-piperidin-4-ylidene-6,11-dihydro-5H-benzo[5,6]cyclohepta[1,2-b]pyridine	NIH Clinical Collection	6	D	3	97.476	97.48
1,3,5(10)-ESTRATRIEN-3-OL-17-ONE SULPHATE, SODIUM SALT	NIH Clinical Collection	6	E	3	99.143	100.96
MIFEPRISTONE	NIH Clinical Collection	6	F	3	100.584	100.81
Etoposide	NIH Clinical Collection	6	G	3	99.347	94.23
Sibutramine	NIH Clinical Collection	6	H	3	108.962	100.31
Clobenpropit	NIH Clinical Collection	6	A	4	91.137	103.05
HUPERZINE A	NIH Clinical Collection	6	B	4	98.633	100.02
SIBUTRAMINE HCl	NIH Clinical Collection	6	C	4	87.213	100
Lorazepam	NIH Clinical Collection	6	D	4	49.926	94.85
8-Azaspiro[4.5]decane-7,9-dione, 8-[2-[[(2,3-dihydro-1,4-benzodioxin-2-yl)methyl]amino]ethyl]-, monomethanesulfonate [CAS]	NIH Clinical Collection	6	E	4	97.442	103.56
Adenosine, N-(2-hydroxycyclopentyl)-, (1S-trans)- [CAS]	NIH Clinical Collection	6	F	4	98.159	97.59
AMIODARONE HYDROCHLORIDE	NIH Clinical Collection	6	G	4	95.996	100.52
mevastatin	NIH Clinical Collection	6	H	4	129.427	110.71
IMATINIB MESYLATE	NIH Clinical Collection	6	A	5	100.516	104.03
Metylperon	NIH Clinical Collection	6	B	5	95.702	105.21
PARECOXIB Na	NIH Clinical Collection	6	C	5	65.661	93.01
PERGOLIDE MESYLATE SALT	NIH Clinical Collection	6	D	5	59.778	98.57
ATRACURIUM BESYLATE	NIH Clinical Collection	6	E	5	97.503	105.74
ARTEMETHER	NIH Clinical Collection	6	F	5	104.221	87.68
EBSELEN	NIH Clinical Collection	6	G	5	84.55	103.09
CGS 12066B	NIH Clinical Collection	6	H	5	108.542	100.19
TELITHROMYCIN	NIH Clinical Collection	6	A	6	101.126	106.13
CCPA	NIH Clinical Collection	6	B	6	101.739	102.34
PD 81723	NIH Clinical Collection	6	C	6	99.45	103.77
Stanozolol	NIH Clinical Collection	6	D	6	62.276	89.61
Zaleplon	NIH Clinical Collection	6	E	6	51.531	100.72
Prostaglandin E1	NIH Clinical Collection	6	F	6	54.639	97.19
Testosterone	NIH Clinical Collection	6	G	6	96.769	101.4
DEHYDROEPIANDROSTERONE	NIH Clinical Collection	6	H	6	110.977	99.56
SDM25N	NIH Clinical Collection	6	A	7	74.178	104.47
Thiophene, 5-bromo-2-(4-fluorophenyl)-3-[4-(methylsulfonyl)phenyl]- [CAS]	NIH Clinical Collection	6	B	7	91.97	101.98
5-Nonyloxytryptamine	NIH Clinical Collection	6	C	7	98.457	99.64
Salmeterol	NIH Clinical Collection	6	D	7	50.12	102.16
SB 205607	NIH Clinical Collection	6	E	7	52.53	101.6
R(+)-SCH-23390 hydrochloride	NIH Clinical Collection	6	F	7	73.108	96.01
Moroxydine HCl	ENZO FDA	1	A	2	95.925	111.76
Spectinomycin	ENZO FDA	1	B	2	97.747	113.23
Phentolamine	ENZO FDA	1	C	2	87.544	105.63
Oxymetazoline	ENZO FDA	1	D	2	86.509	103.1
Nicergoline	ENZO FDA	1	E	2	95.985	104.83
Cimaterol	ENZO FDA	1	F	2	60.605	96.38
Telenzepine	ENZO FDA	1	G	2	111.851	101.22
Cimetidine	ENZO FDA	1	H	2	123.332	95.75
Clindamycin	ENZO FDA	1	A	3	99.218	108.42
Bepridil	ENZO FDA	1	B	3	92.335	109.55
QUININE	ENZO FDA	1	C	3	89.982	109.59
Ifenprodil	ENZO FDA	1	D	3	86.337	105.84
Emtricitabine	ENZO FDA	1	E	3	90.509	102.92
Dobutamine	ENZO FDA	1	F	3	61.356	96.08
Tropicamide	ENZO FDA	1	G	3	104.594	97.57
Tiotidine	ENZO FDA	1	H	3	135.464	95.79
Clindamycin palmitate	ENZO FDA	1	A	4	95.562	108.86
Amiodarone	ENZO FDA	1	B	4	91.862	112
Flufenamic acid	ENZO FDA	1	C	4	103.329	111.78
Naftopidil	ENZO FDA	1	D	4	76.418	113.81
Betaxolol	ENZO FDA	1	E	4	96.106	109.46
Pronethalol	ENZO FDA	1	F	4	91.508	103.98
Pancuronium	ENZO FDA	1	G	4	105.932	102.24
Zonisamide	ENZO FDA	1	H	4	130.32	101.23
Cyclosporin A	ENZO FDA	1	A	5	81.032	107.21
Nicardipine	ENZO FDA	1	B	5	83.665	113.12
Propafenone	ENZO FDA	1	C	5	88.759	108.74
Prazosin	ENZO FDA	1	D	5	94.36	100.93
Practolol	ENZO FDA	1	E	5	96.469	106.05
Sotalol	ENZO FDA	1	F	5	95.743	101.85
Ivermectin	ENZO FDA	1	G	5	205.767	86.41
Zoledronic acid	ENZO FDA	1	H	5	118.457	93.68
Kasugamycin	ENZO FDA	1	A	6	101.013	106.73
Pimozide	ENZO FDA	1	B	6	62.563	110.35
Phenytoin	ENZO FDA	1	C	6	95.021	113.65
Clonidine HCl	ENZO FDA	1	D	6	95.442	107.43
Timolol (S)	ENZO FDA	1	E	6	97.564	105
Maprotiline	ENZO FDA	1	F	6	93.464	98.25
Physostigmine	ENZO FDA	1	G	6	116.748	99.18
Naltrexone	ENZO FDA	1	H	6	127.404	96.97
Lincomycin	ENZO FDA	1	A	7	94.001	110.89
Loperamide	ENZO FDA	1	B	7	72.925	109.21
Procainamide	ENZO FDA	1	C	7	105.167	113.96
Guanabenz	ENZO FDA	1	D	7	95.201	105.63
Xamoterol	ENZO FDA	1	E	7	104.151	107.48
Nisoxetine	ENZO FDA	1	F	7	105.613	102.71
Nialamide	ENZO FDA	1	G	7	115.325	105.66
Zolmitriptan	ENZO FDA	1	H	7	115.325	97.35
Lomofungin	ENZO FDA	1	A	8	93.882	110.94
Fluspirilene	ENZO FDA	1	B	8	60.255	117.88
Lidocaine	ENZO FDA	1	C	8	103.456	111.25
Rilmenidine	ENZO FDA	1	D	8	91.096	102.69
Clenbuterol	ENZO FDA	1	E	8	52.231	103.38
Canthaxanthin	ENZO FDA	1	F	8	108.185	115.68
Haloperidol	ENZO FDA	1	G	8	87.89	94.77
Memantine	ENZO FDA	1	H	8	119.628	99.54
Mycophenolic Acid	ENZO FDA	1	A	9	17.769	51.93
Tolbutamide	ENZO FDA	1	B	9	91.331	114.02
Flecainide	ENZO FDA	1	C	9	104.277	112.21
Spiroxatrine	ENZO FDA	1	D	9	107.281	109.27
Procaterol	ENZO FDA	1	E	9	66.951	105.29
Pilocarpine	ENZO FDA	1	F	9	111.719	108.86
Piribedil	ENZO FDA	1	G	9	118.663	103.92
Aniracetam	ENZO FDA	1	H	9	121.995	102.05
Novobiocin	ENZO FDA	1	A	10	85.48	94.9
Pinacidil	ENZO FDA	1	B	10	94.9	107.72
Phenamil	ENZO FDA	1	C	10	82.484	107.73
Yohimbine HCl	ENZO FDA	1	D	10	88.701	100.77
Salbutamol	ENZO FDA	1	E	10	79.26	95.43
Ipratropium	ENZO FDA	1	F	10	98.481	99.4
Mepyramine	ENZO FDA	1	G	10	92.454	94.62
Riluzole	ENZO FDA	1	H	10	107.603	93.42
Rapamycin	ENZO FDA	1	A	11	84.343	99.89
Glipizide	ENZO FDA	1	B	11	102.011	113.67
Cirazoline	ENZO FDA	1	C	11	102.136	106.89
Dihydroergotamine	ENZO FDA	1	D	11	111.059	102.73
Pindolol	ENZO FDA	1	E	11	100.021	104.78
Pirenzepine	ENZO FDA	1	F	11	100.144	102.86
Trans-Triprolidine	ENZO FDA	1	G	11	105.358	99.85
Propofol	ENZO FDA	1	H	11	111.785	100.89
Mianserin	ENZO FDA	2	A	2	110.969	115.45
Strychnine	ENZO FDA	2	B	2	100.792	113.46
Sulpiride S (-)	ENZO FDA	2	C	2	98.608	115.82
Quetiapine Fumarate	ENZO FDA	2	D	2	96.93	109.27
Nalbuphine	ENZO FDA	2	E	2	101.146	114.07
Vardenafil	ENZO FDA	2	F	2	83.21	105.99
Olanzapine	ENZO FDA	2	G	2	96.93	104.79
Butenafine	ENZO FDA	2	H	2	91.139	122.14
Aminophylline	ENZO FDA	2	A	3	128.842	120.14
Tubocuraraine (+)	ENZO FDA	2	B	3	119.589	117.47
Diphenhydramine	ENZO FDA	2	C	3	101.926	117.03
Alprenolol	ENZO FDA	2	D	3	98.678	113.65
Carbamylcholine	ENZO FDA	2	E	3	108.185	116.94
Linezolid	ENZO FDA	2	F	3	101.997	113.28
Lovastatin	ENZO FDA	2	G	3	142.962	121.19
Dorzolamide	ENZO FDA	2	H	3	122.583	106.86
Furafylline	ENZO FDA	2	A	4	121.811	113.69
Butaclamol (+)	ENZO FDA	2	B	4	104.426	119.35
Promethazine	ENZO FDA	2	C	4	93.812	110.43
Imipramine	ENZO FDA	2	D	4	88.021	99.02
Carbamyl-beta-methylcholine	ENZO FDA	2	E	4	105.721	101.18
Docetaxel	ENZO FDA	2	F	4	93.812	95.03
Lamotrigine	ENZO FDA	2	G	4	123.511	99.55
Escitalopram	ENZO FDA	2	H	4	107.095	91.84
Nateglinide	ENZO FDA	2	A	5	122.814	116.42
Apomorphine R (-)	ENZO FDA	2	B	5	107.531	117.02
Ranitidine	ENZO FDA	2	C	5	97.488	118.04
Amoxapine	ENZO FDA	2	D	5	81.296	102.77
Butyrylcholine	ENZO FDA	2	E	5	95.124	105.33
Olopatadine	ENZO FDA	2	F	5	94.018	100.53
Ractopamine	ENZO FDA	2	G	5	68.422	98.58
Eprosartan	ENZO FDA	2	H	5	113.486	91.98
Isoproterenol (Rac)	ENZO FDA	2	A	6	80.049	113.61
Chlorpromazine	ENZO FDA	2	B	6	83.21	109.74
Naltrindole	ENZO FDA	2	C	6	97.278	117.4
Mesulergine	ENZO FDA	2	D	6	97.348	105.62
FAMOTIDINE	ENZO FDA	2	E	6	119.513	120.51
Manidipine	ENZO FDA	2	F	6	91.276	127.51
Sildenafil	ENZO FDA	2	G	6	131.071	113.86
Sodium Phenylacetate	ENZO FDA	2	H	6	136.738	100.91
Acetylcholine	ENZO FDA	2	A	7	112.002	120.6
Domperidone	ENZO FDA	2	B	7	113.784	116.8
Idazoxan	ENZO FDA	2	C	7	100.015	112.25
Amfebutamone	ENZO FDA	2	D	7	104.928	102.52
Terfenadine	ENZO FDA	2	E	7	108.623	103.56
Tolcapone	ENZO FDA	2	F	7	113.71	102.5
Atovaquone	ENZO FDA	2	G	7	126.162	110.63
Ozagrel	ENZO FDA	2	H	7	140.12	101.33
Atropine	ENZO FDA	2	A	8	107.24	119.14
Fluphenazine	ENZO FDA	2	B	8	98.678	121.4
Spiperone	ENZO FDA	2	C	8	119.208	118.35
Metoclopramide	ENZO FDA	2	D	8	114.829	110.08
Isoniazid	ENZO FDA	2	E	8	111.411	111.44
Gestrinone	ENZO FDA	2	F	8	109.5	107.22
Sertaconazole	ENZO FDA	2	G	8	118.447	120.33
Entacapone	ENZO FDA	2	H	8	147.205	89.21
Decamethonium	ENZO FDA	2	A	9	108.112	114.09
Pergolide	ENZO FDA	2	B	9	106.515	116.6
Epinephrine-(+)- L (-)	ENZO FDA	2	C	9	72.036	105.57
Naltriben methanesulfonate hydrate	ENZO FDA	2	D	9	105.216	112.14
Ticlopidine	ENZO FDA	2	E	9	99.24	106.16
Olmesartan	ENZO FDA	2	F	9	104.857	102.11
Cefepime	ENZO FDA	2	G	9	115.504	96.69
Bleomycin	ENZO FDA	2	H	9	135.92	98.18
Mecamylamine	ENZO FDA	2	A	10	113.114	101.3
Raclopride S(-)	ENZO FDA	2	B	10	105.432	103.33
Xylazine	ENZO FDA	2	C	10	95.609	102.45
Vitamin A acetate	ENZO FDA	2	D	10	85.939	106.97
Amorolfine	ENZO FDA	2	E	10	84.206	107.04
Nisoldipine	ENZO FDA	2	F	10	84.206	93.05
Aripiprazole	ENZO FDA	2	G	10	98.187	97.64
Bopindolol	ENZO FDA	2	H	10	103.423	91.64
Neostigmine	ENZO FDA	2	A	11	126.475	101.57
Risperidone	ENZO FDA	2	B	11	128.683	105.74
Norepinephrine-(+)-tartrate L (-)	ENZO FDA	2	C	11	83.608	97.97
Levallorphan	ENZO FDA	2	D	11	119.436	104.42
Clemastine	ENZO FDA	2	E	11	101.926	100.38
Lacidipine	ENZO FDA	2	F	11	92.643	110.15
Candesartan	ENZO FDA	2	G	11	120.736	89.13
Guanfacine	ENZO FDA	2	H	11	124.054	84.15
Tizanidine	ENZO FDA	3	A	2	96.145	89.23
Imatinib	ENZO FDA	3	B	2	98.149	99.7
Dofetilide	ENZO FDA	3	C	2	86.295	90.11
Galanthamine	ENZO FDA	3	D	2	87.904	86.61
Gabapentin	ENZO FDA	3	E	2	94.408	87.87
Molsidomine	ENZO FDA	3	F	2	98.842	88.37
Calcitriol	ENZO FDA	3	G	2	81.078	96.08
Clofibrate	ENZO FDA	3	H	2	109.681	81.27
Meglumine	ENZO FDA	3	A	3	106.439	90.35
Idarubicin	ENZO FDA	3	B	3	11.048	3.67
Erlotinib	ENZO FDA	3	C	3	102.604	101.49
Amiloride	ENZO FDA	3	D	3	84.227	94.21
Felodipine	ENZO FDA	3	E	3	110.752	94.16
Pravadoline	ENZO FDA	3	F	3	107.822	99.15
Ketoconazole	ENZO FDA	3	G	3	89.405	103.56
Ibuprofen	ENZO FDA	3	H	3	128.657	84.41
Propranolol S(-)	ENZO FDA	3	A	4	102.347	100.8
Montelukast	ENZO FDA	3	B	4	97.27	105.2
Lobeline	ENZO FDA	3	C	4	97.96	102.43
Amlodipine	ENZO FDA	3	D	4	86.413	94.73
Cilnidipine	ENZO FDA	3	E	4	81.832	108.41
Tranilast	ENZO FDA	3	F	4	94.408	95.11
Oxatomide	ENZO FDA	3	G	4	88.263	102.86
Benserazide	ENZO FDA	3	H	4	116.815	86.33
Carvedilol	ENZO FDA	3	A	5	84.816	101.58
Deprenyl HCl	ENZO FDA	3	B	5	84.522	101.63
Melatonin	ENZO FDA	3	C	5	88.563	101.39
Diltiazem	ENZO FDA	3	D	5	81.948	102.21
Phenoxybenzamine HCl	ENZO FDA	3	E	5	84.757	105.29
Shikonin	ENZO FDA	3	F	5	11.149	14.54
Disodium Cromoglycate	ENZO FDA	3	G	5	103.313	100.07
Debrisoquin	ENZO FDA	3	H	5	116.401	106.15
Cerivastatin	ENZO FDA	3	A	6	153.165	121.31
Vatalanib	ENZO FDA	3	B	6	88.863	113.28
Dinoprost	ENZO FDA	3	C	6	103.507	101.89
Nifedipine	ENZO FDA	3	D	6	85.229	114.42
Trifluoperazine 2HCl	ENZO FDA	3	E	6	83.172	112.93
Bromocriptine	ENZO FDA	3	F	6	87.008	119.02
Capsaicin	ENZO FDA	3	G	6	106.833	111.18
Methiothepin	ENZO FDA	3	H	6	112.707	106.31
Aclarubicin	ENZO FDA	3	A	7	20.42	6.69
Fumagillin	ENZO FDA	3	B	7	91.099	101.95
HA1077	ENZO FDA	3	C	7	94.161	105.77
Nimodipine	ENZO FDA	3	D	7	89.164	113.22
Denbufylline	ENZO FDA	3	E	7	59.691	108.52
Clozapine	ENZO FDA	3	F	7	93.791	106.46
Dexamethasone	ENZO FDA	3	G	7	43.147	112.76
Bumetanide	ENZO FDA	3	H	7	116.815	105.14
Flumazenil	ENZO FDA	3	A	8	92.196	103.07
Efaroxan	ENZO FDA	3	B	8	90.493	105.75
Hydroxytacrine	ENZO FDA	3	C	8	94.038	102.34
Nitrendipine	ENZO FDA	3	D	8	82.122	104.89
Miltefosine	ENZO FDA	3	E	8	97.082	115.52
Clothiapine	ENZO FDA	3	F	8	74.578	95.01
Dipyridamole	ENZO FDA	3	G	8	84.698	94.83
Neomycin	ENZO FDA	3	H	8	117.509	101.94
Fenretinide	ENZO FDA	3	A	9	90.19	112.86
Dinoprostone	ENZO FDA	3	B	9	67.015	108.86
Oxotremorine	ENZO FDA	3	C	9	97.96	110.48
Verapamil	ENZO FDA	3	D	9	98.275	115.36
Latanoprost	ENZO FDA	3	E	9	103.443	112.92
QUINPIROLE (-)-	ENZO FDA	3	F	9	97.207	109.42
Ethacrynic Acid	ENZO FDA	3	G	9	70.461	106.53
Auranofin	ENZO FDA	3	H	9	1.358	5.52
Gefitinib	ENZO FDA	3	A	10	100.11	100.98
Metformin	ENZO FDA	3	B	10	83.231	106.74
Tacrine	ENZO FDA	3	C	10	93.176	104.21
Niguldipine	ENZO FDA	3	D	10	62.338	104.18
Ouabain	ENZO FDA	3	E	10	97.082	103.98
Remoxipride	ENZO FDA	3	F	10	92.135	101.87
Indomethacin	ENZO FDA	3	G	10	79.463	95.52
Captopril	ENZO FDA	3	H	10	112.03	107.67
Ibudilast	ENZO FDA	3	A	11	69.746	102.91
Anagrelide	ENZO FDA	3	B	11	94.346	101.67
Gallamine	ENZO FDA	3	C	11	100.555	104.51
Flunarizine 2HCl	ENZO FDA	3	D	11	92.135	114.63
Clopamide	ENZO FDA	3	E	11	96.02	106.87
Calcifediol	ENZO FDA	3	F	11	79.463	111.37
Naproxen	ENZO FDA	3	G	11	106.636	106.69
Docebenone	ENZO FDA	3	H	11	101.577	106.83
Tranylcypromine	ENZO FDA	4	A	2	88.511	114.47
Ergothioneine	ENZO FDA	4	B	2	88.981	114.13
Bezafibrate	ENZO FDA	4	C	2	65.389	111.2
Daunorubicin	ENZO FDA	4	D	2	8.685	3.09
Sulindac	ENZO FDA	4	E	2	104.179	110.94
Diazoxide	ENZO FDA	4	F	2	96.429	111.22
Abamectin	ENZO FDA	4	G	2	89.926	99.97
Enalaprilat	ENZO FDA	4	H	2	108.111	115.04
Piroxicam	ENZO FDA	4	A	3	105.459	110.64
Ambroxol	ENZO FDA	4	B	3	90.936	114.64
Raloxifene	ENZO FDA	4	C	3	62.314	118.28
Doxorubicin HCl	ENZO FDA	4	D	3	36.495	13.95
Valproic acid	ENZO FDA	4	E	3	93.21	108.39
Glyburide	ENZO FDA	4	F	3	89.335	107.79
Alfacalcidol	ENZO FDA	4	G	3	88.1	121.95
Fluvastatin	ENZO FDA	4	H	3	167.58	126.53
Deprenyl HCl	ENZO FDA	4	A	4	95.818	108.6
Idebenone	ENZO FDA	4	B	4	70.433	108.93
Camptothecin	ENZO FDA	4	C	4	40.429	22.47
Tanshinone IIA	ENZO FDA	4	D	4	75.711	117.08
Calcipotriene	ENZO FDA	4	E	4	74.941	117.3
Minoxidil	ENZO FDA	4	F	4	84.958	113.55
Anethole-trithione	ENZO FDA	4	G	4	83.75	115.06
Fosinopril	ENZO FDA	4	H	4	116.504	105.02
Troleandomycin	ENZO FDA	4	A	5	85.826	106.81
Mevastatin	ENZO FDA	4	B	5	95.818	108.24
Plicamycin	ENZO FDA	4	C	5	114.067	67.3
Lapatinib	ENZO FDA	4	D	5	73.682	131.49
Zafirlukast	ENZO FDA	4	E	5	117.05	103.11
Tolazamide	ENZO FDA	4	F	5	84.958	103.49
Anastrozole	ENZO FDA	4	G	5	95.634	106.68
Gemcitabine	ENZO FDA	4	H	5	105.523	75.98
Carbidopa	ENZO FDA	4	A	6	91.353	110.92
Simvastatin	ENZO FDA	4	B	6	118.215	119.16
Rifampicin	ENZO FDA	4	C	6	83.52	107.68
Methyl salicylate	ENZO FDA	4	D	6	85.362	118.52
Zileuton	ENZO FDA	4	E	6	92.669	114.67
Nicorandil	ENZO FDA	4	F	6	95.695	122.27
Bicalutamide	ENZO FDA	4	G	6	94.6	116.46
Ginkgolide A	ENZO FDA	4	H	6	108.176	114.69
Nimesulide	ENZO FDA	4	A	7	87.982	110.51
Suramin	ENZO FDA	4	B	7	93.09	119.98
Etoposide	ENZO FDA	4	C	7	106.425	112.7
Pioglitazone	ENZO FDA	4	D	7	93.331	130.86
Pentamidine	ENZO FDA	4	E	7	99.391	135.06
Bexarotene	ENZO FDA	4	F	7	100.077	130.55
Clodronate	ENZO FDA	4	G	7	96.551	123.71
Granisetron	ENZO FDA	4	H	7	123.515	124.51
Ketoprofen	ENZO FDA	4	A	8	84.785	106.54
Goserelin	ENZO FDA	4	B	8	81.072	112.42
Mitomycin C	ENZO FDA	4	C	8	123.162	97.28
Pranlukast	ENZO FDA	4	D	8	79.606	112.57
Bortezomib	ENZO FDA	4	E	8	8	4.21
Bromebric acid	ENZO FDA	4	F	8	79.493	105.79
Clindamycin	ENZO FDA	4	G	8	88.041	128.84
Nedaplatin	ENZO FDA	4	H	8	115.688	105.74
Meloxicam	ENZO FDA	4	A	9	79.437	104.76
Guaiacol	ENZO FDA	4	B	9	79.269	106.05
Puromycin	ENZO FDA	4	C	9	107.526	48.62
Rivastigmine	ENZO FDA	4	D	9	80.394	107.64
Bambuterol	ENZO FDA	4	E	9	85.305	105.72
Celecoxib	ENZO FDA	4	F	9	78.095	102.24
Diclazuril	ENZO FDA	4	G	9	83.463	86.24
Oxaliplatin	ENZO FDA	4	H	9	156.548	93.84
Terbinafine	ENZO FDA	4	A	10	70.648	117.95
Retinoic Acid	ENZO FDA	4	B	10	69.896	122.14
Delavirdine	ENZO FDA	4	C	10	93.271	105.11
Rofecoxib	ENZO FDA	4	D	10	77.038	102.72
Fentiazac	ENZO FDA	4	E	10	86.639	102.45
Levetiracetam	ENZO FDA	4	F	10	82.606	100.38
Didanosine	ENZO FDA	4	G	10	81.412	101.69
Anethole, trans-	ENZO FDA	4	H	10	100.202	99.68
Sodium Phenylbutyrate	ENZO FDA	4	A	11	78.429	97.42
Troglitazone	ENZO FDA	4	B	11	80.056	112.21
10-Hydroxycamptothecin	ENZO FDA	4	C	11	58.923	46.98
Ergotamine	ENZO FDA	4	D	11	87.631	126.79
Mephenytoin	ENZO FDA	4	E	11	83.005	109.03
Letrozole	ENZO FDA	4	F	11	89.394	105.85
Dolasetron	ENZO FDA	4	G	11	100.264	113.69
Atazanavir	ENZO FDA	4	H	11	94.358	111.35
Mycophenolate mofetil	ENZO FDA	5	A	2	20.816	44.57
Lofexidine	ENZO FDA	5	B	2	85.835	100.74
Rocuronium	ENZO FDA	5	C	2	99.76	108.14
Acetylsalicylic Acid	ENZO FDA	5	D	2	103.213	106.41
Amifostine	ENZO FDA	5	E	2	104.337	105.67
Azaperone	ENZO FDA	5	F	2	95.953	106.51
Carbadox	ENZO FDA	5	G	2	101.602	98.14
Chloroquine	ENZO FDA	5	H	2	106.227	100.55
Etoricoxib	ENZO FDA	5	A	3	98.301	98.3
Meropenem	ENZO FDA	5	B	3	89.376	96.54
Ricobendazole	ENZO FDA	5	C	3	86.231	96.03
Acipimox	ENZO FDA	5	D	3	85.101	94.31
DL-Aminoglutethimide	ENZO FDA	5	E	3	91.523	92.18
Vinblastine	ENZO FDA	5	F	3	91.815	85.06
Carboplatin	ENZO FDA	5	G	3	93.813	99.62
Thalidomide	ENZO FDA	5	H	3	108.328	90.44
Clofarabine	ENZO FDA	5	A	4	121.278	73.85
Nifekalant	ENZO FDA	5	B	4	89.896	105.67
Sulbactam	ENZO FDA	5	C	4	95.178	99.49
Aceclofenac	ENZO FDA	5	D	4	95.356	98.53
4-Aminosalicylic acid	ENZO FDA	5	E	4	86.572	95.92
Azithromycin	ENZO FDA	5	F	4	83.641	99.26
Carbamazepine	ENZO FDA	5	G	4	94.702	98.23
Ciprofloxacin	ENZO FDA	5	H	4	75.596	92.3
Cabergoline	ENZO FDA	5	A	5	90.418	96.24
Octreotide	ENZO FDA	5	B	5	89.781	104.68
Thiamphenicol glycinate	ENZO FDA	5	C	5	88.169	95.71
Acycloguanosine	ENZO FDA	5	D	5	92.635	90.98
5-Aminosalicylic acid	ENZO FDA	5	E	5	97.998	90.47
Aztreonam	ENZO FDA	5	F	5	93.636	88.67
Cefoperazone acid	ENZO FDA	5	G	5	95.894	91.81
Citalopram	ENZO FDA	5	H	5	97.877	91.28
Dilazep	ENZO FDA	5	A	6	83.977	98.91
Oseltamivir	ENZO FDA	5	B	6	83.306	100.36
Tulobuterol	ENZO FDA	5	C	6	59.346	91.94
3'-Azido-3'-deoxythymidine	ENZO FDA	5	D	6	97.093	97.56
Ampicillin	ENZO FDA	5	E	6	94.702	91.76
Betamethasone	ENZO FDA	5	F	6	41.088	100.52
Cefotaxime Acid	ENZO FDA	5	G	6	96.133	93.04
Clarithromycin	ENZO FDA	5	H	6	109.034	99.51
Ibandronate	ENZO FDA	5	A	7	84.819	100.42
Pamidronic acid	ENZO FDA	5	B	7	87.94	105.53
Vinorelbine	ENZO FDA	5	C	7	95.356	100.5
Allopurinol	ENZO FDA	5	D	7	92.283	97.62
Ampiroxicam	ENZO FDA	5	E	7	100.25	95.24
Bifonazole	ENZO FDA	5	F	7	70.257	101.7
Ceftazidime	ENZO FDA	5	G	7	91.757	87.22
Climbazole	ENZO FDA	5	H	7	100.863	91.77
Imipenem	ENZO FDA	5	A	8	86.572	118.77
Pramipexole	ENZO FDA	5	B	8	86.572	113.38
Vindesine	ENZO FDA	5	C	8	129.886	99.44
Alendronate	ENZO FDA	5	D	8	98.786	105.01
Apramycin	ENZO FDA	5	E	8	98.543	116.89
Bisacodyl	ENZO FDA	5	F	8	92.049	110.49
Chloramphenicol	ENZO FDA	5	G	8	98.482	106.16
Clinafloxacin	ENZO FDA	5	H	8	108.2	105
Lomustine	ENZO FDA	5	A	9	76.617	117.09
Triptorelin	ENZO FDA	5	B	9	87.141	113.26
Salmeterol	ENZO FDA	5	C	9	40.859	110.53
Altretamine	ENZO FDA	5	D	9	91.932	106.84
Artemisinin	ENZO FDA	5	E	9	98.361	102.49
Bromhexine	ENZO FDA	5	F	9	84.313	117.71
Chlormadinone Acetate	ENZO FDA	5	G	9	82.748	99.01
Clomiphene	ENZO FDA	5	H	9	93.577	107.18
Iloprost	ENZO FDA	5	A	10	70.832	111.97
RIFAMYCIN SV	ENZO FDA	5	B	10	85.157	95.3
Vincristine	ENZO FDA	5	C	10	44.274	93.83
Albendazole	ENZO FDA	5	D	10	86.515	82.89
Atenolol	ENZO FDA	5	E	10	95.774	105.74
Buspirone	ENZO FDA	5	F	10	83.138	95.93
Chlorambucil	ENZO FDA	5	G	10	91.698	83.63
Clopidol	ENZO FDA	5	H	10	105.028	96.02
Lomerizine	ENZO FDA	5	A	11	59.197	103.27
Risedronic acid	ENZO FDA	5	B	11	80.811	94.43
Acemetacin	ENZO FDA	5	C	11	50.048	102.4
Sumatriptan Succinate	ENZO FDA	5	D	11	88.341	97.04
Atracurium	ENZO FDA	5	E	11	67.051	108.45
Canrenone	ENZO FDA	5	F	11	75.274	96.84
Chlorpheniramine	ENZO FDA	5	G	11	80.866	97.61
Clopidogrel	ENZO FDA	5	H	11	64.805	102.01
Clobetasol Propionate	ENZO FDA	6	A	2	46.434	106.33
Dehydroepiandrosterone	ENZO FDA	6	B	2	101.529	98.95
Doxofylline	ENZO FDA	6	C	2	98.919	98.83
Etidronate	ENZO FDA	6	D	2	99.261	94.57
5-Fluorouracil	ENZO FDA	6	E	2	113.492	100.57
Ftorafur	ENZO FDA	6	F	2	103.61	99.92
Hydrocortisone	ENZO FDA	6	G	2	68.098	97.13
Levamisole	ENZO FDA	6	H	2	112.045	99.61
Closantel	ENZO FDA	6	A	3	58.556	108.91
Desloratadine	ENZO FDA	6	B	3	83.74	99.34
Doxycycline	ENZO FDA	6	C	3	90.919	102.75
Etretinate	ENZO FDA	6	D	3	82.456	119.96
Flurbiprofen	ENZO FDA	6	E	3	97.76	111.72
Furosemide	ENZO FDA	6	F	3	95.055	103.72
Hydrocortisone 21-acetate	ENZO FDA	6	G	3	53.093	106.94
Levonorgestrel	ENZO FDA	6	H	3	103.819	102.73
Corticosterone	ENZO FDA	6	A	4	61.826	102.33
Dextromethorphan	ENZO FDA	6	B	4	95.055	102.69
Enalapril	ENZO FDA	6	C	4	100.977	105.05
Trichloromethiazide	ENZO FDA	6	D	4	94.585	105.24
Fleroxacin	ENZO FDA	6	E	4	92.578	109.9
Ganciclovir	ENZO FDA	6	F	4	96.946	107.82
17- Hydroxyprogesterone	ENZO FDA	6	G	4	81.05	120.45
Levodopa	ENZO FDA	6	H	4	129.178	104.09
Crotamiton	ENZO FDA	6	A	5	72.269	112.1
Diclofenac	ENZO FDA	6	B	5	95.864	96.68
Enoxacin	ENZO FDA	6	C	5	97.353	103.6
Famciclovir	ENZO FDA	6	D	5	101.598	100.6
Florfenicol	ENZO FDA	6	E	5	95.122	107.19
Gatifloxacin	ENZO FDA	6	F	5	100.702	104.1
Idoxuridine	ENZO FDA	6	G	5	91.382	99.65
Levofloxacin	ENZO FDA	6	H	5	109.604	101.52
Cyclophosphamide	ENZO FDA	6	A	6	75.186	102.99
2',3' - Dideoxycytidine	ENZO FDA	6	B	6	98.373	95.89
Enrofloxacin	ENZO FDA	6	C	6	94.652	101.69
Fenbendazole	ENZO FDA	6	D	6	99.672	62.13
Floxuridine	ENZO FDA	6	E	6	97.76	98.2
Gentamycin	ENZO FDA	6	F	6	99.946	105.21
Ifosfamide	ENZO FDA	6	G	6	92.512	100.35
Leflunomide	ENZO FDA	6	H	6	95.122	99.36
Cyproterone Acetate	ENZO FDA	6	A	7	82.328	100.11
Diethylstilbestrol	ENZO FDA	6	B	7	79.335	93.11
Ethisterone	ENZO FDA	6	C	7	86.133	100.83
Fenbufen	ENZO FDA	6	D	7	87.37	94.68
Fluocinolone acetonide	ENZO FDA	6	E	7	44.769	105.69
Gemfibrozil	ENZO FDA	6	F	7	99.672	100.07
Imiquimod	ENZO FDA	6	G	7	105.99	108.14
Lisinopril	ENZO FDA	6	H	7	104.447	102.67
Cyclocytidine	ENZO FDA	6	A	8	77.567	100.44
Diflunisal	ENZO FDA	6	B	8	92.578	94.84
Esomeprazole	ENZO FDA	6	C	8	84.901	100.11
Fenoldopam	ENZO FDA	6	D	8	99.398	104.5
Flubendazole	ENZO FDA	6	E	8	84.901	86.2
Gliclazide	ENZO FDA	6	F	8	100.427	104.09
Indapamide	ENZO FDA	6	G	8	0.391	92.33
Lomefloxacin	ENZO FDA	6	H	8	100.909	101.59
Cytarabine	ENZO FDA	6	A	9	83.418	91.29
Disulfiram	ENZO FDA	6	B	9	77.504	99.85
Estradiol	ENZO FDA	6	C	9	87.305	104.5
Fenoprofen	ENZO FDA	6	D	9	91.78	92.98
Flutamide	ENZO FDA	6	E	9	71.59	106.73
Glimepiride	ENZO FDA	6	F	9	99.878	101.71
Itopride	ENZO FDA	6	G	9	97.421	105.82
Loratadine	ENZO FDA	6	H	9	89.928	94.89
Dacarbazine	ENZO FDA	6	A	10	61.527	112.58
Doxazosin	ENZO FDA	6	B	10	97.964	102.53
Estriol	ENZO FDA	6	C	10	95.661	105.98
Fenofibrate	ENZO FDA	6	D	10	66.397	106.38
Fluconazole	ENZO FDA	6	E	10	84.643	111.02
Guaifenesin	ENZO FDA	6	F	10	95.392	101.89
Itraconazole	ENZO FDA	6	G	10	84.966	95.63
Lorglumide	ENZO FDA	6	H	10	103.54	110.37
Danazol	ENZO FDA	6	A	11	62.663	101.26
Doxifluridine	ENZO FDA	6	B	11	91.449	98.29
Estrone	ENZO FDA	6	C	11	78.829	105.4
Finasteride	ENZO FDA	6	D	11	86.718	101.54
Formestane	ENZO FDA	6	E	11	83.547	111.25
Hexestrol	ENZO FDA	6	F	11	77.442	104.72
Ketoprofen	ENZO FDA	6	G	11	95.257	93.9
Losartan potassium	ENZO FDA	6	H	11	89.467	99.83
Mebendazol	ENZO FDA	7	A	2	98.388	76.05
Minocycline	ENZO FDA	7	B	2	86.055	95.05
Norfloxacin	ENZO FDA	7	C	2	84.528	97.94
Pantoprazole	ENZO FDA	7	D	2	81.455	104.44
Pranoprofen	ENZO FDA	7	E	2	101.452	118.17
Quinacrine	ENZO FDA	7	F	2	77.073	103.38
Roxatidine acetate	ENZO FDA	7	G	2	96.815	98.72
Stanozolol	ENZO FDA	7	H	2	95.914	98.52
Medroxyprogesterone 17-Acetate	ENZO FDA	7	A	3	96.875	102.71
Mitoxantrone	ENZO FDA	7	B	3	52.922	49.84
Nystatin	ENZO FDA	7	C	3	88.399	118.78
Paroxetine	ENZO FDA	7	D	3	79.8	113.77
Prednisolone	ENZO FDA	7	E	3	40.056	123.56
Quinapril	ENZO FDA	7	F	3	92.294	109.71
Roxithromycin	ENZO FDA	7	G	3	99.302	108.47
Streptomycin	ENZO FDA	7	H	3	108.704	102.89
Mefenamic acid	ENZO FDA	7	A	4	97.903	98.16
Taxol	ENZO FDA	7	B	4	100.036	71.44
Ofloxacin	ENZO FDA	7	C	4	84.979	100.12
Pazufloxacin	ENZO FDA	7	D	4	74.332	113.93
Progesterone	ENZO FDA	7	E	4	64.695	131.54
Racecadotril	ENZO FDA	7	F	4	79.088	104.81
Rufloxacin	ENZO FDA	7	G	4	103.253	97.96
Sulfadoxine	ENZO FDA	7	H	4	102.692	93.22
Melphalan	ENZO FDA	7	A	5	86.852	99.52
Myclobutanil	ENZO FDA	7	B	5	67.718	84.35
Oltipraz	ENZO FDA	7	C	5	67.254	113.23
Pefloxacine	ENZO FDA	7	D	5	84.528	99.62
Procarbazine	ENZO FDA	7	E	5	92.176	101.64
Ranolazine	ENZO FDA	7	F	5	82.958	102.13
Sarafloxacin	ENZO FDA	7	G	5	98.024	103.45
Sulfadiazine	ENZO FDA	7	H	5	100.773	103.73
Methyldopa	ENZO FDA	7	A	6	81.289	96.63
Nadifloxacin	ENZO FDA	7	B	6	82.623	95.34
Omeprazole	ENZO FDA	7	C	6	82.79	97.31
Penciclovir	ENZO FDA	7	D	6	83.013	96.05
Prothionamide	ENZO FDA	7	E	6	85.885	100.73
Ramipril	ENZO FDA	7	F	6	84.81	97.76
Scopolamine N-butyl	ENZO FDA	7	G	6	95.734	96.86
Sulfadimethoxine	ENZO FDA	7	H	6	94.125	96.43
Methylprednisolone	ENZO FDA	7	A	7	40.653	94.94
Nabumetone	ENZO FDA	7	B	7	78.65	92.58
Oxcarbazepine	ENZO FDA	7	C	7	86.966	91.94
Pentoxifylline	ENZO FDA	7	D	7	89.033	100.05
Prednisone	ENZO FDA	7	E	7	91.239	100.59
Rebamipide	ENZO FDA	7	F	7	82.066	102.88
Scopolamine	ENZO FDA	7	G	7	97.539	102.99
Sulfasalazine	ENZO FDA	7	H	7	90.714	94.97
Metoprolol	ENZO FDA	7	A	8	75.295	94.46
Naphazoline	ENZO FDA	7	B	8	83.966	100.82
Oxiconazole	ENZO FDA	7	C	8	54.857	102.87
Pencillin V	ENZO FDA	7	D	8	85.262	92.78
Pregnenolone	ENZO FDA	7	E	8	76.911	102.92
Ribavirin	ENZO FDA	7	F	8	87.138	95.47
Secnidazole	ENZO FDA	7	G	8	84.022	90.17
Tamsulosin	ENZO FDA	7	H	8	101.576	96.47
Methimazole	ENZO FDA	7	A	9	74.118	90.58
Nefazodone	ENZO FDA	7	B	9	71.417	94.85
Oxacillin	ENZO FDA	7	C	9	85.942	86.81
Phenylbutazone	ENZO FDA	7	D	9	87.024	81.16
Primaquine	ENZO FDA	7	E	9	82.288	96.05
Nelfinavir mesylate	ENZO FDA	7	F	9	74.171	99.72
Sibutramine	ENZO FDA	7	G	9	74.545	87.02
Telmisartan	ENZO FDA	7	H	9	90.656	85.49
Metronidazole	ENZO FDA	7	A	10	78.377	93.4
Niflumic acid	ENZO FDA	7	B	10	90.307	80.17
Oxfendazole	ENZO FDA	7	C	10	89.553	85.91
Piperacillin	ENZO FDA	7	D	10	85.036	80.68
Praziquantel	ENZO FDA	7	E	10	89.959	92.88
Rimantadine	ENZO FDA	7	F	10	88.456	90.72
Sparfloxacin	ENZO FDA	7	G	10	82.902	90.7
Tenoxicam	ENZO FDA	7	H	10	91.415	82.33
Miconazole	ENZO FDA	7	A	11	53.501	91.11
Norethindrone	ENZO FDA	7	B	11	82.846	93.37
Oxibendazole	ENZO FDA	7	C	11	97.237	81.08
Pravastatin Lactone	ENZO FDA	7	D	11	87.309	94.07
Pyrantel Pamoate	ENZO FDA	7	E	11	95.794	80.88
Propranolol	ENZO FDA	7	F	11	102.755	88.61
Spironolactone	ENZO FDA	7	G	11	100.65	94.78
Terazosin	ENZO FDA	7	H	11	91.473	84.83
Tetracycline	ENZO FDA	8	A	2	90.722	94.7
Tolfenamic acid	ENZO FDA	8	B	2	97.037	101.26
Venlafaxine	ENZO FDA	8	C	2	88.358	106.65
Harmine	ENZO FDA	8	D	2	61.51	100
Thioridazine	ENZO FDA	8	E	2	93.646	102.89
Zaprinast	ENZO FDA	8	F	2	100.431	98.73
Megestrol Acetate	ENZO FDA	8	G	2	99.759	105.73
Methysergide	ENZO FDA	8	H	2	108.501	105.8
Tenatoprazole	ENZO FDA	8	A	3	96.079	93.88
Tolmetin	ENZO FDA	8	B	3	86.818	97.24
Vidarabine	ENZO FDA	8	C	3	100.86	104.85
Cinanserin	ENZO FDA	8	D	3	82.106	100.33
Cilostamide	ENZO FDA	8	E	3	97.759	103.76
Zardaverine	ENZO FDA	8	F	3	74.769	94.71
Melengestrol Acetate	ENZO FDA	8	G	3	72.594	106.81
Esmolol	ENZO FDA	8	H	3	112.511	99.05
Temozolomide	ENZO FDA	8	A	4	87.045	96.72
Toltrazuril	ENZO FDA	8	B	4	77.454	98.55
Iproniazid	ENZO FDA	8	C	4	90.374	102.86
Dibenzepine	ENZO FDA	8	D	4	77.616	93.94
Etazolate	ENZO FDA	8	E	4	82.05	90.55
Alprostadil	ENZO FDA	8	F	4	52.596	90.74
Tamoxifen	ENZO FDA	8	G	4	82.883	107.6
Pantothenic acid	ENZO FDA	8	H	4	100.676	89.81
Tibolone	ENZO FDA	8	A	5	84.111	99.27
Tramadol	ENZO FDA	8	B	5	83.831	106.22
Benzamil	ENZO FDA	8	C	5	84.111	108.88
Dihydroergocristine	ENZO FDA	8	D	5	74.662	111.35
Isobutylmethylxanthine	ENZO FDA	8	E	5	97.638	112.34
Misoprostol	ENZO FDA	8	F	5	77.346	103.37
Amprenavir	ENZO FDA	8	G	5	108.629	101.39
Phloridzin	ENZO FDA	8	H	5	106.339	96.44
Tioconazole	ENZO FDA	8	A	6	63.67	101.53
Triamcinolone	ENZO FDA	8	B	6	38.791	108.69
Bupivacaine	ENZO FDA	8	C	6	82.217	105.39
Fluperlapine	ENZO FDA	8	D	6	71.91	97.33
Irsogladine	ENZO FDA	8	E	6	94.473	100.64
Argatroban	ENZO FDA	8	F	6	96.258	102.49
Aprepitant	ENZO FDA	8	G	6	95.601	111.96
Phenylpropanolamine	ENZO FDA	8	H	6	98.182	99.51
Tinidazole	ENZO FDA	8	A	7	92.295	108.9
Trimethoprim	ENZO FDA	8	B	7	81.276	102.88
Astemizole	ENZO FDA	8	C	7	86.875	103.75
Fluoxetine	ENZO FDA	8	D	7	71.49	96.76
Milrinone	ENZO FDA	8	E	7	92.12	100.66
Cilastatin	ENZO FDA	8	F	7	92.999	93.75
Bosentan	ENZO FDA	8	G	7	97.699	99.41
Succinylcholine	ENZO FDA	8	H	7	96.258	92.93
Tobramycin (free base)	ENZO FDA	8	A	8	85.121	103.63
Tropisetron	ENZO FDA	8	B	8	72.12	101.08
Ketotifen	ENZO FDA	8	C	8	85.065	111.31
Ondansetron	ENZO FDA	8	D	8	83.663	95
Rolipram	ENZO FDA	8	E	8	55.74	99.85
Artesunate	ENZO FDA	8	F	8	110.495	69.34
Efavirenz	ENZO FDA	8	G	8	80.891	100.01
Trifluperidol	ENZO FDA	8	H	8	90.316	97.41
Tosufloxacin	ENZO FDA	8	A	9	91.536	98.42
Tylosin	ENZO FDA	8	B	9	78.266	99.74
Levocabastine	ENZO FDA	8	C	9	79.465	98.95
Ketanserin	ENZO FDA	8	D	9	76.644	99.8
Siguazodan	ENZO FDA	8	E	9	85.516	98.17
Picotamide	ENZO FDA	8	F	9	83.552	93.78
Taurocholic acid	ENZO FDA	8	G	9	87.901	101.75
L-thyroxine	ENZO FDA	8	H	9	94.769	98.37
Topotecan	ENZO FDA	8	A	10	85.798	94.19
Valaciclovir	ENZO FDA	8	B	10	80.726	100.63
Naloxone	ENZO FDA	8	C	10	84.672	110.8
Tiotropium Bromide	ENZO FDA	8	D	10	80.396	102.05
Trequinsin HCl	ENZO FDA	8	E	10	79.519	104.69
Conduritol B epoxide	ENZO FDA	8	F	10	85.178	97.05
Miglustat	ENZO FDA	8	G	10	88.473	93.11
Cyproheptadine	ENZO FDA	8	H	10	84.953	90.53
Toremifene	ENZO FDA	8	A	11	83.552	111.99
Vecuronium	ENZO FDA	8	B	11	79.738	107.44
Naloxonazine	ENZO FDA	8	C	11	83.05	102.97
Mesoridazine	ENZO FDA	8	D	11	75.036	99.03
Vinpocetine	ENZO FDA	8	E	11	83.496	96.96
Mifepristone	ENZO FDA	8	F	11	74.13	100.42
Fulvestrant	ENZO FDA	8	G	11	75.249	109.03
Benzydamine	ENZO FDA	8	H	11	75.249	86.18
Azaguanine-8	Prestwick	1	A	2	159.111	74.29
Meticrane	Prestwick	1	B	2	68.676	101.08
Sulfaphenazole	Prestwick	1	C	2	65.798	104.66
Chloramphenicol	Prestwick	1	D	2	69.538	99.16
Procaine hydrochloride	Prestwick	1	E	2	68.584	94.94
Trichlorfon	Prestwick	1	F	2	90.858	94.34
Morantel tartrate	Prestwick	1	G	2	70.551	94.76
Todralazine hydrochloride	Prestwick	1	H	2	81.458	93.33
Allantoin	Prestwick	1	A	3	95.942	108.98
Benzonatate	Prestwick	1	B	3	74.468	106.9
Panthenol (D)	Prestwick	1	C	3	78.256	106.96
Epirizole	Prestwick	1	D	3	72.524	93.13
Moxisylyte hydrochoride	Prestwick	1	E	3	59.926	98.39
Carbamazepine	Prestwick	1	F	3	81.224	94.72
Homatropine hydrobromide (R,S)	Prestwick	1	G	3	64.54	91.5
Imipramine hydrochloride	Prestwick	1	H	3	79.633	111.28
Acetazolamide	Prestwick	1	A	4	93.975	108.13
Hydroflumethiazide	Prestwick	1	B	4	72.316	96.12
Sulfadiazine	Prestwick	1	C	4	71.047	90.9
Diprophylline	Prestwick	1	D	4	75.709	102.35
Betazole hydrochloride	Prestwick	1	E	4	62.828	91.35
Triflupromazine hydrochloride	Prestwick	1	F	4	68.756	100.59
Nifedipine	Prestwick	1	G	4	59.199	102.04
Sulindac	Prestwick	1	H	4	81.739	90.69
Metformin hydrochloride	Prestwick	1	A	5	79.049	99.83
Sulfacetamide sodic hydrate	Prestwick	1	B	5	76.243	102.82
Norethynodrel	Prestwick	1	C	5	68.676	105.57
Triamterene	Prestwick	1	D	5	72.743	103.4
Isoxicam	Prestwick	1	E	5	64.334	97.73
Mefenamic acid	Prestwick	1	F	5	74.375	83.47
Chlorpromazine hydrochloride	Prestwick	1	G	5	57.985	102.18
Amitryptiline hydrochloride	Prestwick	1	H	5	73.889	89.53
Atracurium besylate	Prestwick	1	A	6	75.953	115.93
Heptaminol hydrochloride	Prestwick	1	B	6	74.213	94.6
Thiamphenicol	Prestwick	1	C	6	72.824	96.05
Dapsone	Prestwick	1	D	6	69.791	97.05
Naproxen	Prestwick	1	E	6	56.988	92.27
Acetohexamide	Prestwick	1	F	6	74.004	91.64
Diphenhydramine hydrochloride	Prestwick	1	G	6	62.691	98.44
Adiphenine hydrochloride	Prestwick	1	H	6	80.054	98.69
Isoflupredone acetate	Prestwick	1	A	7	42.743	99.06
Sulfathiazole	Prestwick	1	B	7	73.229	96.11
Cimetidine	Prestwick	1	C	7	75.07	92.5
Troleandomycin	Prestwick	1	D	7	67.298	104.48
Naphazoline hydrochloride	Prestwick	1	E	7	60.505	86.58
Sulpiride	Prestwick	1	F	7	73.044	88.09
Minaprine dihydrochloride	Prestwick	1	G	7	71.081	88.85
Dibucaine	Prestwick	1	H	7	89.467	110.83
Amiloride hydrochloride dihydrate	Prestwick	1	A	8	69.526	107.62
Levodopa	Prestwick	1	B	8	72.027	92.5
Doxylamine succinate	Prestwick	1	C	8	76.789	96.87
Pyrimethamine	Prestwick	1	D	8	64.745	81.89
Ticlopidine hydrochloride	Prestwick	1	E	8	54.172	91.17
Benoxinate hydrochloride	Prestwick	1	F	8	77.371	104.76
Miconazole	Prestwick	1	G	8	56.286	104.91
Prednisone	Prestwick	1	H	8	78.664	107.53
Amprolium hydrochloride	Prestwick	1	A	9	76.871	92.32
Idoxuridine	Prestwick	1	B	9	67.757	88.98
Ethambutol dihydrochloride	Prestwick	1	C	9	77.115	90.43
Hexamethonium dibromide dihydrate	Prestwick	1	D	9	72.351	91.09
Dicyclomine hydrochloride	Prestwick	1	E	9	58.79	106.44
Oxethazaine	Prestwick	1	F	9	56.478	114.44
Isoxsuprine hydrochloride	Prestwick	1	G	9	45.724	105.43
Thioridazine hydrochloride	Prestwick	1	H	9	72.085	112.8
Hydrochlorothiazide	Prestwick	1	A	10	80.919	92.8
Captopril	Prestwick	1	B	10	68.699	93.33
Antipyrine	Prestwick	1	C	10	71.958	97.71
Diflunisal	Prestwick	1	D	10	62.759	86.98
Amyleine hydrochloride	Prestwick	1	E	10	57.203	97.32
Pheniramine maleate	Prestwick	1	F	10	68.607	89.53
Acebutolol hydrochloride	Prestwick	1	G	10	58.575	99.98
Diphemanil methylsulfate	Prestwick	1	H	10	71.819	110.07
Sulfaguanidine	Prestwick	1	A	11	77.185	87.76
Minoxidil	Prestwick	1	B	11	66.45	83.27
Antipyrine, 4-hydroxy	Prestwick	1	C	11	68.756	81.18
Niclosamide	Prestwick	1	D	11	239.246	58.2
Lidocaïne hydrochloride	Prestwick	1	E	11	33.171	90.67
Tolazoline hydrochloride	Prestwick	1	F	11	43.998	87.48
Tolnaftate	Prestwick	1	G	11	28.942	89.64
Trimethobenzamide hydrochloride	Prestwick	1	H	11	60.187	97.38
Metronidazole	Prestwick	2	A	2	83.085	102.96
Khellin	Prestwick	2	B	2	77.886	95.31
R(-) Apomorphine hydrochloride hemihydrate	Prestwick	2	C	2	78.371	104.11
Naloxone hydrochloride	Prestwick	2	D	2	78.177	96.68
Bromocryptine mesylate	Prestwick	2	E	2	52.467	87.51
Glipizide	Prestwick	2	F	2	82.584	94.16
Verapamil hydrochloride	Prestwick	2	G	2	66.209	106.33
Erythromycin	Prestwick	2	H	2	100.196	104.76
Fulvestrant	Prestwick	2	A	3	83.893	111.98
Zimelidine dihydrochloride monohydrate	Prestwick	2	B	3	78.043	100.25
Amoxapine	Prestwick	2	C	3	69.07	97.27
Metolazone	Prestwick	2	D	3	72.567	82.84
Amfepramone hydrochloride	Prestwick	2	E	3	62.798	96.01
Loxapine succinate	Prestwick	2	F	3	81.206	97.29
Dipyridamole	Prestwick	2	G	3	65.278	105.16
Chloroxine	Prestwick	2	H	3	97.363	103.93
Edrophonium chloride	Prestwick	2	A	4	96.538	100.91
Azacyclonol	Prestwick	2	B	4	78.226	101.8
Cyproheptadine hydrochloride	Prestwick	2	C	4	72.399	102.84
Ciprofloxacin hydrochloride	Prestwick	2	D	4	78.213	102.28
Dehydrocholic acid	Prestwick	2	E	4	59.506	92.02
Hydroxyzine dihydrochloride	Prestwick	2	F	4	77.364	101.21
Chlorhexidine	Prestwick	2	G	4	60.04	77.09
Didanosine	Prestwick	2	H	4	100.963	105.4
Moroxidine hydrochloride	Prestwick	2	A	5	88.967	103.17
Azathioprine	Prestwick	2	B	5	70.258	92.52
Famotidine	Prestwick	2	C	5	74.606	93.55
Ampicillin trihydrate	Prestwick	2	D	5	76.553	85.07
Tioconazole	Prestwick	2	E	5	57.538	86.73
Diltiazem hydrochloride	Prestwick	2	F	5	79.392	104.38
Loperamide hydrochloride	Prestwick	2	G	5	61.085	103.08
Josamycin	Prestwick	2	H	5	94.394	111.26
Baclofen (R,S)	Prestwick	2	A	6	91.142	92.64
Lynestrenol	Prestwick	2	B	6	65.385	103.61
Danazol	Prestwick	2	C	6	71.256	104.7
Haloperidol	Prestwick	2	D	6	58.877	95.82
Perphenazine	Prestwick	2	E	6	46.086	99.06
Methotrexate	Prestwick	2	F	6	79.307	67.44
Chlortetracycline hydrochloride	Prestwick	2	G	6	68.651	99.41
Paclitaxel	Prestwick	2	H	6	128.879	53.47
Acyclovir	Prestwick	2	A	7	92.195	89.74
Guanabenz acetate	Prestwick	2	B	7	77.789	93.24
Nicorandil	Prestwick	2	C	7	72.459	96.2
Naltrexone hydrochloride dihydrate	Prestwick	2	D	7	73.954	97.8
Mefloquine hydrochloride	Prestwick	2	E	7	48.25	99.38
Astemizole	Prestwick	2	F	7	109.867	42.34
Tamoxifen citrate	Prestwick	2	G	7	60.277	94.52
Ivermectin	Prestwick	2	H	7	116.025	73.35
Diazoxide	Prestwick	2	A	8	93.361	101.54
Disulfiram	Prestwick	2	B	8	62.453	85.21
Pioglitazone	Prestwick	2	C	8	72.869	89.28
Chlorpheniramine maleate	Prestwick	2	D	8	69.442	95.42
Isoconazole	Prestwick	2	E	8	49.603	98.46
Clindamycin hydrochloride	Prestwick	2	F	8	77.777	97.2
Nicergoline	Prestwick	2	G	8	59.85	101.22
Gallamine triethiodide	Prestwick	2	H	8	85.253	102.38
Amidopyrine	Prestwick	2	A	9	86.542	98.76
Acetylsalicylsalicylic acid	Prestwick	2	B	9	71.232	86.06
Nomifensine maleate	Prestwick	2	C	9	68.83	94.15
Nalbuphine hydrochloride	Prestwick	2	D	9	69.586	99.56
Spironolactone	Prestwick	2	E	9	52.278	98.92
Terfenadine	Prestwick	2	F	9	80.45	94.38
Canrenoic acid potassium salt	Prestwick	2	G	9	67.501	90.34
Neomycin sulfate	Prestwick	2	H	9	86.505	107.07
Busulfan	Prestwick	2	A	10	90.573	96.93
Mianserine hydrochloride	Prestwick	2	B	10	71.304	100.47
Dizocilpine maleate	Prestwick	2	C	10	76.722	90.6
Picotamide monohydrate	Prestwick	2	D	10	70.835	91.16
Pirenzepine dihydrochloride	Prestwick	2	E	10	57.656	91.25
Cefotaxime sodium salt	Prestwick	2	F	10	75.754	75.53
Thioproperazine dimesylate	Prestwick	2	G	10	64.359	105.03
Dihydrostreptomycin sulfate	Prestwick	2	H	10	93.784	97.64
Pindolol	Prestwick	2	A	11	102.223	107.93
Nocodazole	Prestwick	2	B	11	75.21	52.87
Oxandrolone	Prestwick	2	C	11	74.255	92.04
Triamcinolone	Prestwick	2	D	11	31.135	91.85
Dexamethasone acetate	Prestwick	2	E	11	23.457	100.38
Tetracycline hydrochloride	Prestwick	2	F	11	72.905	87.86
Dihydroergotamine tartrate	Prestwick	2	G	11	62.012	100.78
Gentamicine sulfate	Prestwick	2	H	11	95.116	100.36
Isoniazid	Prestwick	3	A	2	66.591	110.32
Tranexamic acid	Prestwick	3	B	2	79.615	112.15
Ampyrone	Prestwick	3	C	2	76.206	103.05
Midodrine hydrochloride	Prestwick	3	D	2	53.971	102.67
Ranitidine hydrochloride	Prestwick	3	E	2	75.993	104.68
Piroxicam	Prestwick	3	F	2	97.636	93.12
Norfloxacin	Prestwick	3	G	2	79.421	113.01
Etodolac	Prestwick	3	H	2	104.678	113.13
Pentylenetetrazole	Prestwick	3	A	3	111.652	99.17
Etofylline	Prestwick	3	B	3	90.251	102.94
Levamisole hydrochloride	Prestwick	3	C	3	94.047	101.3
Thalidomide	Prestwick	3	D	3	87.763	98.73
Tiratricol, 3,3',5-triiodothyroacetic acid	Prestwick	3	E	3	69.163	97.26
Pyrantel tartrate	Prestwick	3	F	3	93.794	110.07
Antimycin A	Prestwick	3	G	3	65.024	77.23
Scopolamin-N-oxide hydrobromide	Prestwick	3	H	3	109.271	131.82
Chlorzoxazone	Prestwick	3	A	4	106.973	105.05
Tranylcypromine hydrochloride	Prestwick	3	B	4	100.058	99.1
Pargyline hydrochloride	Prestwick	3	C	4	87.685	100.99
Oxolinic acid	Prestwick	3	D	4	84.52	102.41
Flufenamic acid	Prestwick	3	E	4	68.951	87.93
Fenspiride hydrochloride	Prestwick	3	F	4	91.01	105.88
Xylometazoline hydrochloride	Prestwick	3	G	4	77.987	109.62
Hyoscyamine (L)	Prestwick	3	H	4	103.835	117
Ornidazole	Prestwick	3	A	5	102.307	100.44
Alverine citrate salt	Prestwick	3	B	5	94.456	111.48
Methocarbamol	Prestwick	3	C	5	89.92	102.99
Nimesulide	Prestwick	3	D	5	88.754	89.43
Flumequine	Prestwick	3	E	5	69.647	100.29
Gemfibrozil	Prestwick	3	F	5	96.582	90.41
Oxymetazoline hydrochloride	Prestwick	3	G	5	79.673	101.19
Chlorphensin carbamate	Prestwick	3	H	5	99.042	114.6
Ethosuximide	Prestwick	3	A	6	101.075	96.6
Aceclofenac	Prestwick	3	B	6	93.54	92.48
Aztreonam	Prestwick	3	C	6	90.601	90.92
Hydrastinine hydrochloride	Prestwick	3	D	6	82.929	101.96
Tolfenamic acid	Prestwick	3	E	6	68.042	89.12
Mefexamide hydrochloride	Prestwick	3	F	6	92.586	103.98
Nifenazone	Prestwick	3	G	6	73.883	101.13
Metampicillin sodium salt	Prestwick	3	H	6	105.089	120.3
Mafenide hydrochloride	Prestwick	3	A	7	105.58	106.49
Iproniazide phosphate	Prestwick	3	B	7	89.629	105.77
Cloxacillin sodium salt	Prestwick	3	C	7	86.015	93.9
Pentoxifylline	Prestwick	3	D	7	86.131	100.16
Meclofenamic acid sodium salt monohydrate	Prestwick	3	E	7	71.717	88.12
Tiapride hydrochloride	Prestwick	3	F	7	97.694	102.52
Griseofulvin	Prestwick	3	G	7	74.638	100.45
Dilazep dihydrochloride	Prestwick	3	H	7	90.368	122.18
Riluzole hydrochloride	Prestwick	3	A	8	88.812	104.98
Sulfamethoxazole	Prestwick	3	B	8	87.471	105.91
Catharanthine	Prestwick	3	C	8	88.482	103.02
Metaraminol bitartrate	Prestwick	3	D	8	83.375	104.34
Tibolone	Prestwick	3	E	8	64.173	99.14
Mebendazole	Prestwick	3	F	8	118.662	69.43
Clemizole hydrochloride	Prestwick	3	G	8	72.955	107.3
Ofloxacin	Prestwick	3	H	8	102.621	110.42
Nitrofurantoin	Prestwick	3	A	9	89.765	94.35
Mephenesin	Prestwick	3	B	9	89.181	95.01
Pentolinium bitartrate	Prestwick	3	C	9	88.851	93.33
Salbutamol	Prestwick	3	D	9	38.304	102.01
Trimethoprim	Prestwick	3	E	9	74.116	102.04
Fenbufen	Prestwick	3	F	9	88.074	117.1
Tropicamide	Prestwick	3	G	9	72.935	103.81
Lomefloxacin hydrochloride	Prestwick	3	H	9	87.607	128.28
Hydralazine hydrochloride	Prestwick	3	A	10	82.115	93.04
Phenformin hydrochloride	Prestwick	3	B	10	87.063	104.64
Aminopurine, 6-benzyl	Prestwick	3	C	10	83.143	100.43
Prilocaine hydrochloride	Prestwick	3	D	10	74.077	98.59
Metoclopramide monohydrochloride	Prestwick	3	E	10	68.312	94.61
Ketoprofen	Prestwick	3	F	10	87.199	112.16
Nefopam hydrochloride	Prestwick	3	G	10	71.542	104.71
Orphenadrine hydrochloride	Prestwick	3	H	10	80.758	131.46
Phenelzine sulfate	Prestwick	3	A	11	115.676	89.81
Flutamide	Prestwick	3	B	11	88.326	90.33
Tolbutamide	Prestwick	3	C	11	88.559	89.6
Camptothecine (S,+)	Prestwick	3	D	11	70.266	41.51
Fenbendazole	Prestwick	3	E	11	67.249	47.92
Indapamide	Prestwick	3	F	11	85.258	110.43
Phentolamine hydrochloride	Prestwick	3	G	11	76.632	103.75
Proglumide	Prestwick	3	H	11	87.801	115.39
Mexiletine hydrochloride	Prestwick	4	A	2	74.01	96.25
Chlorothiazide	Prestwick	4	B	2	62.457	99.59
Ethisterone	Prestwick	4	C	2	73.89	100.21
Vincamine	Prestwick	4	D	2	68.092	98.18
Fludrocortisone acetate	Prestwick	4	E	2	29.513	98.39
Dantrolene sodium salt	Prestwick	4	F	2	77.661	98.28
Lisinopril	Prestwick	4	G	2	67.853	94.05
Ifenprodil tartrate	Prestwick	4	H	2	85.155	110.2
Flavoxate hydrochloride	Prestwick	4	A	3	88.702	100.98
Diphenidol hydrochloride	Prestwick	4	B	3	73.595	104.79
Triprolidine hydrochloride	Prestwick	4	C	3	76.679	102.46
Indomethacin	Prestwick	4	D	3	76.33	91.86
Fenoterol hydrobromide	Prestwick	4	E	3	30.589	99.92
Trazodone hydrochloride	Prestwick	4	F	3	75.86	107.03
Lincomycin hydrochloride	Prestwick	4	G	3	70.8	101.16
Flunarizine dihydrochloride	Prestwick	4	H	3	80.839	105.07
Bufexamac	Prestwick	4	A	4	81.744	91.97
Norethindrone	Prestwick	4	B	4	73.983	97.88
Doxepin hydrochloride	Prestwick	4	C	4	73.059	101.77
Cortisone	Prestwick	4	D	4	73.943	99.37
Homochlorcyclizine dihydrochloride	Prestwick	4	E	4	46.473	103.85
Glafenine hydrochloride	Prestwick	4	F	4	60.217	107.98
Telenzepine dihydrochloride	Prestwick	4	G	4	70.133	101.61
Trifluoperazine dihydrochloride	Prestwick	4	H	4	79.1	110.37
Glutethimide, para-amino	Prestwick	4	A	5	83.732	96.12
Nortriptyline hydrochloride	Prestwick	4	B	5	63.837	104.28
Dyclonine hydrochloride	Prestwick	4	C	5	66.122	109.06
Prednisolone	Prestwick	4	D	5	33.399	106.75
Diethylcarbamazine citrate	Prestwick	4	E	5	56.962	95.01
Pimethixene maleate	Prestwick	4	F	5	68.012	100.5
Econazole nitrate	Prestwick	4	G	5	64.129	104.38
Enalapril maleate	Prestwick	4	H	5	84.653	104.33
Dropropizine (R,S)	Prestwick	4	A	6	86.553	96.16
Niflumic acid	Prestwick	4	B	6	73.046	89.43
Dimenhydrinate	Prestwick	4	C	6	70.867	101.62
Fenofibrate	Prestwick	4	D	6	62.032	101.93
Chenodiol	Prestwick	4	E	6	54.742	106.41
Pergolide mesylate	Prestwick	4	F	6	73.555	96.09
Bupivacaine hydrochloride	Prestwick	4	G	6	65.431	100.88
Minocycline hydrochloride	Prestwick	4	H	6	88.198	111.07
Pinacidil	Prestwick	4	A	7	89.41	95.7
Isotretinoin	Prestwick	4	B	7	55.786	111.48
Disopyramide	Prestwick	4	C	7	74.814	103.6
Bumetanide	Prestwick	4	D	7	73.903	94.7
Perhexiline maleate	Prestwick	4	E	7	53.158	98.48
Acemetacin	Prestwick	4	F	7	76.33	92.63
Clemastine fumarate	Prestwick	4	G	7	63.438	107.75
Glibenclamide	Prestwick	4	H	7	80.57	105.77
Albendazole	Prestwick	4	A	8	93.319	89.15
Retinoic acid	Prestwick	4	B	8	49.623	111.61
Clotrimazole	Prestwick	4	C	8	59.396	89.46
Labetalol hydrochloride	Prestwick	4	D	8	62.735	106.9
Oxybutynin chloride	Prestwick	4	E	8	50.441	102.86
Benzydamine hydrochloride	Prestwick	4	F	8	75.914	111.96
Oxytetracycline dihydrate	Prestwick	4	G	8	70.159	86.5
Guanethidine sulfate	Prestwick	4	H	8	93.223	104.96
Clonidine hydrochloride	Prestwick	4	A	9	77.136	95.1
Antazoline hydrochloride	Prestwick	4	B	9	71	102.71
Vinpocetine	Prestwick	4	C	9	60.203	103.68
Cinnarizine	Prestwick	4	D	9	57.53	102.94
Spiperone	Prestwick	4	E	9	56.724	104.07
Fipexide hydrochloride	Prestwick	4	F	9	71.749	101.98
Pimozide	Prestwick	4	G	9	51.68	103.62
Quinacrine dihydrochloride dihydrate	Prestwick	4	H	9	61.926	101.55
Bupropion hydrochloride	Prestwick	4	A	10	80.758	112.81
Ethacrynic acid	Prestwick	4	B	10	44.51	97.65
Clomipramine hydrochloride	Prestwick	4	C	10	57.689	105.33
Methylprednisolone, 6-alpha	Prestwick	4	D	10	31.146	110.18
Pyrilamine maleate	Prestwick	4	E	10	51.034	102.81
Mifepristone	Prestwick	4	F	10	63.186	97.67
Amodiaquin dihydrochloride dihydrate	Prestwick	4	G	10	54.465	98.42
Clofilium tosylate	Prestwick	4	H	10	81.757	81.22
Alprenolol hydrochloride	Prestwick	4	A	11	77.795	104.86
Praziquantel	Prestwick	4	B	11	73.997	102.26
Fendiline hydrochloride	Prestwick	4	C	11	63.73	109.83
Quinidine hydrochloride monohydrate	Prestwick	4	D	11	69.159	104.51
Sulfinpyrazone	Prestwick	4	E	11	53.699	90.57
Diperodon hydrochloride	Prestwick	4	F	11	67.227	102.75
Mebeverine hydrochloride	Prestwick	4	G	11	65.697	102.42
Fluphenazine dihydrochloride	Prestwick	4	H	11	71.495	107.2
Streptomycin sulfate	Prestwick	5	A	2	80.404	93.16
Tremorine dihydrochloride	Prestwick	5	B	2	65.667	83.49
Furosemide	Prestwick	5	C	2	66.211	78.65
Chlorthalidone	Prestwick	5	D	2	63.626	85.61
Bambuterol hydrochloride	Prestwick	5	E	2	65.735	87.52
Ketotifen fumarate	Prestwick	5	F	2	82.308	88.23
Lidoflazine	Prestwick	5	G	2	61.193	95.15
Terbutaline hemisulfate	Prestwick	5	H	2	41.936	95.64
Alfuzosin hydrochloride	Prestwick	5	A	3	89.772	91.82
Practolol	Prestwick	5	B	3	73.478	84.28
Methapyrilene hydrochloride	Prestwick	5	C	3	72.834	87.33
Dobutamine hydrochloride	Prestwick	5	D	3	45.01	91.66
Betamethasone	Prestwick	5	E	3	24.45	90.08
Debrisoquin sulfate	Prestwick	5	F	3	78.654	78.43
Betaxolol hydrochloride	Prestwick	5	G	3	63.653	91.01
Ketanserin tartrate hydrate	Prestwick	5	H	3	80.735	106.6
Chlorpropamide	Prestwick	5	A	4	85.491	85.48
Zidovudine, AZT	Prestwick	5	B	4	76.646	85.1
Desipramine hydrochloride	Prestwick	5	C	4	68.297	92.77
Moclobemide	Prestwick	5	D	4	76.564	91.03
Colchicine	Prestwick	5	E	4	119.252	60.2
Amethopterin (R,S)	Prestwick	5	F	4	71.096	66.33
Nicardipine hydrochloride	Prestwick	5	G	4	61.777	93.3
Hemicholinium bromide	Prestwick	5	H	4	86.546	101.22
Phenylpropanolamine hydrochloride	Prestwick	5	A	5	79.122	104.44
Sulfisoxazole	Prestwick	5	B	5	63.748	93.51
Clorgyline hydrochloride	Prestwick	5	C	5	63	99.12
Clopamide	Prestwick	5	D	5	69.99	90.55
Metergoline	Prestwick	5	E	5	53.196	93.39
Methylergometrine maleate	Prestwick	5	F	5	72.04	99.35
Probucol	Prestwick	5	G	5	67.465	105.75
Kanamycin A sulfate	Prestwick	5	H	5	89.744	111.84
Ascorbic acid	Prestwick	5	A	6	78.888	102.18
Zaprinast	Prestwick	5	B	6	65.313	93.17
Clenbuterol hydrochloride	Prestwick	5	C	6	32.249	98.24
Hycanthone	Prestwick	5	D	6	47.716	95.88
Brinzolamide	Prestwick	5	E	6	54.116	88.18
Methiothepin maleate	Prestwick	5	F	6	72.191	89.37
Mitoxantrone dihydrochloride	Prestwick	5	G	6	22.217	2.95
Amikacin hydrate	Prestwick	5	H	6	80.486	116.61
Methyldopa (L,-)	Prestwick	5	A	7	81.687	101.87
Chlormezanone	Prestwick	5	B	7	66.552	94.64
Maprotiline hydrochloride	Prestwick	5	C	7	44.969	99.12
Adenosine 5'-monophosphate monohydrate	Prestwick	5	D	7	66.075	92.16
Ambroxol hydrochloride	Prestwick	5	E	7	52.37	93.32
Clofazimine	Prestwick	5	F	7	65.762	75.67
GBR 12909 dihydrochloride	Prestwick	5	G	7	50.963	100.38
Etoposide	Prestwick	5	H	7	87.74	100.72
Cefoperazone dihydrate	Prestwick	5	A	8	81.908	104.24
Procainamide hydrochloride	Prestwick	5	B	8	64.972	91.42
Thioguanosine	Prestwick	5	C	8	61.438	78.63
Amoxicillin	Prestwick	5	D	8	66.28	91.56
Benfluorex hydrochloride	Prestwick	5	E	8	50.625	93.39
Nafronyl oxalate	Prestwick	5	F	8	73.053	96.41
Carbetapentane citrate	Prestwick	5	G	8	55.809	100.17
Clomiphene citrate (Z,E)	Prestwick	5	H	8	63.966	110.69
Zoxazolamine	Prestwick	5	A	9	75.726	104.48
N6-methyladenosine	Prestwick	5	B	9	61.316	93.46
Chlorprothixene hydrochloride	Prestwick	5	C	9	46.66	100.71
Cephalexin monohydrate	Prestwick	5	D	9	68.447	95.91
Bepridil hydrochloride	Prestwick	5	E	9	50.936	92.05
Bezafibrate	Prestwick	5	F	9	72.341	96.5
Dequalinium dichloride	Prestwick	5	G	9	69.634	76.99
Oxantel pamoate	Prestwick	5	H	9	70.208	113.78
Tacrine hydrochloride hydrate	Prestwick	5	A	10	71.124	106.36
Guanfacine hydrochloride	Prestwick	5	B	10	59.795	94.67
Ritodrine hydrochloride	Prestwick	5	C	10	32.208	97.65
Dextromethorphan hydrobromide monohydrate	Prestwick	5	D	10	63.68	95.38
Meloxicam	Prestwick	5	E	10	51.599	90.82
Nefazodone HCl	Prestwick	5	F	10	65.544	102.64
Ketoconazole	Prestwick	5	G	10	48.379	106.49
Prochlorperazine dimaleate	Prestwick	5	H	10	60.569	115.76
Bisoprolol fumarate	Prestwick	5	A	11	73.779	109.69
Domperidone	Prestwick	5	B	11	58.791	99.23
Clozapine	Prestwick	5	C	11	54.252	101.78
Droperidol	Prestwick	5	D	11	58.222	97.03
Benzbromarone	Prestwick	5	E	11	48.554	86.37
Clebopride maleate	Prestwick	5	F	11	62.919	96.77
Fusidic acid sodium salt	Prestwick	5	G	11	47.58	106.35
Hesperidin	Prestwick	5	H	11	67.847	118.5
Testosterone propionate	Prestwick	6	A	2	103.366	143.03
Androsterone	Prestwick	6	B	2	73.975	116.96
Suloctidil	Prestwick	6	C	2	56.072	130.96
Pefloxacine	Prestwick	6	D	2	68.51	115.99
Estradiol-17 beta	Prestwick	6	E	2	62.614	111.43
Alizapride HCl	Prestwick	6	F	2	91.61	117.02
Tropisetron HCl	Prestwick	6	G	2	72.993	125
Vatalanib	Prestwick	6	H	2	85.731	142.42
Arecoline hydrobromide	Prestwick	6	A	3	107.744	132.14
Amifostine	Prestwick	6	B	3	81.77	113.22
Zotepine	Prestwick	6	C	3	66.147	118.15
Corticosterone	Prestwick	6	D	3	51.066	112.1
Clobutinol hydrochloride	Prestwick	6	E	3	56.3	108.93
Stanozolol	Prestwick	6	F	3	88.588	124.81
Cefixime	Prestwick	6	G	3	78.062	126.89
Itopride	Prestwick	6	H	3	85.079	142.13
Thyroxine (L)	Prestwick	6	A	4	92.742	138.04
Carbarsone	Prestwick	6	B	4	75.869	108.39
Carisoprodol	Prestwick	6	C	4	75.044	115.26
Cyanocobalamin	Prestwick	6	D	4	75.43	108.3
Gabazine	Prestwick	6	E	4	61.792	107.29
Calcipotriene	Prestwick	6	F	4	69.595	112.87
Metrizamide	Prestwick	6	G	4	70.751	114.41
Cefotetan	Prestwick	6	H	4	89.277	130.02
Idebenone	Prestwick	6	A	5	81.137	118.94
Amlodipine	Prestwick	6	B	5	66.585	118.3
Cephalosporanic acid, 7-amino	Prestwick	6	C	5	68.44	112.55
Cefadroxil	Prestwick	6	D	5	79.502	105.22
Oxcarbazepine	Prestwick	6	E	5	68.387	113
Linezolid	Prestwick	6	F	5	82.157	110.81
Quetiapine	Prestwick	6	G	5	72.993	120.44
Fentiazac	Prestwick	6	H	5	84.586	134.46
Pepstatin A	Prestwick	6	A	6	86.577	111.79
Modafinil	Prestwick	6	B	6	73.291	111.38
Chicago sky blue 6B	Prestwick	6	C	6	76.465	135.21
Cyclosporin A	Prestwick	6	D	6	64.486	114.04
Cyclobenzaprine hydrochloride	Prestwick	6	E	6	54.988	118.18
Mebhydroline 1,5-naphtalenedisulfonate	Prestwick	6	F	6	78.606	110.74
Tosufloxacin hydrochloride	Prestwick	6	G	6	74.588	110.59
Brompheniramine maleate	Prestwick	6	H	6	88.059	130.53
SR-95639A	Prestwick	6	A	7	88.888	122.87
Bacampicillin hydrochloride	Prestwick	6	B	7	78.765	112.01
Buflomedil hydrochloride	Prestwick	6	C	7	70.576	122.3
Digitoxigenin	Prestwick	6	D	7	73.957	115.22
Carteolol hydrochloride	Prestwick	6	E	7	65.64	107.93
Meclocycline sulfosalicylate	Prestwick	6	F	7	83.318	105.54
Efavirenz	Prestwick	6	G	7	69.613	117.86
Primaquine diphosphate	Prestwick	6	H	7	87.229	129.79
Adamantamine fumarate	Prestwick	6	A	8	85.273	123.27
Lamivudine	Prestwick	6	B	8	76.518	115.96
Dibenzepine hydrochloride	Prestwick	6	C	8	75.816	125.34
Digoxin	Prestwick	6	D	8	84.145	113.96
Hydrocortisone base	Prestwick	6	E	8	28.89	115.38
Meclozine dihydrochloride	Prestwick	6	F	8	75.676	117.95
Rifapentine	Prestwick	6	G	8	69.385	115.7
Progesterone	Prestwick	6	H	8	84.445	137.82
Butoconazole nitrate	Prestwick	6	A	9	72.713	140.62
Biotin	Prestwick	6	B	9	80.451	114.02
Roxatidine Acetate HCl	Prestwick	6	C	9	73.239	120.69
Doxorubicin hydrochloride	Prestwick	6	D	9	31.804	2.84
Hydroxytacrine maleate (R,S)	Prestwick	6	E	9	61.232	113.89
Melatonin	Prestwick	6	F	9	84.779	116.45
Neostigmine bromide	Prestwick	6	G	9	71.959	120.34
Felodipine	Prestwick	6	H	9	71.924	115.46
Amiodarone hydrochloride	Prestwick	6	A	10	76.377	132.98
Bisacodyl	Prestwick	6	B	10	74.658	107.76
Cholecalciferol	Prestwick	6	C	10	69.56	140.47
Carbimazole	Prestwick	6	D	10	70.418	109.01
Pilocarpine nitrate	Prestwick	6	E	10	60.848	107.28
Butalbital	Prestwick	6	F	10	80.715	114.64
Niridazole	Prestwick	6	G	10	71.294	117.45
Raclopride	Prestwick	6	H	10	77.167	137.36
Amphotericin B	Prestwick	6	A	11	110.917	131.6
Erlotinib	Prestwick	6	B	11	66.76	116.35
Cisapride	Prestwick	6	C	11	63.366	124.25
Epiandrosterone	Prestwick	6	D	11	76.956	120.7
Dicloxacillin sodium salt	Prestwick	6	E	11	58.207	96.45
Dinoprost trometamol	Prestwick	6	F	11	79.081	101.88
Ceforanide	Prestwick	6	G	11	74.571	116.83
Closantel	Prestwick	6	H	11	75.395	120.08
Serotonin hydrochloride	Prestwick	7	A	2	93.555	97.53
Metixene hydrochloride	Prestwick	7	B	2	58.463	89.47
Vigabatrin	Prestwick	7	C	2	61.66	88.2
Fluoxetine hydrochloride	Prestwick	7	D	2	58.118	89.43
Lofexidine	Prestwick	7	E	2	65.596	84.23
Pirenperone	Prestwick	7	F	2	73.531	81.82
Ciclopirox ethanolamine	Prestwick	7	G	2	59.936	96.55
Hexetidine	Prestwick	7	H	2	58.557	92.55
Cefotiam hydrochloride	Prestwick	7	A	3	88.584	99.6
Nitrofural	Prestwick	7	B	3	64.639	94.99
Biperiden hydrochloride	Prestwick	7	C	3	67.605	90.05
Iohexol	Prestwick	7	D	3	64.263	87.13
Thiostrepton	Prestwick	7	E	3	54.233	54.34
Isoquinoline, 6,7-dimethoxy-1-methyl-1,2,3,4-tetrahydro, hydrochloride	Prestwick	7	F	3	71.548	78.96
Probenecid	Prestwick	7	G	3	66.208	91.08
Selegiline hydrochloride	Prestwick	7	H	3	84.394	86.25
Rofecoxib	Prestwick	7	A	4	86.98	95.15
Omeprazole	Prestwick	7	B	4	65.863	92.41
Cetirizine dihydrochloride	Prestwick	7	C	4	61.848	92.78
Norcyclobenzaprine	Prestwick	7	D	4	58.588	89.79
Miglitol	Prestwick	7	E	4	62.459	81.8
Phenacetin	Prestwick	7	F	4	72.838	78.51
Betahistine mesylate	Prestwick	7	G	4	65.266	92.31
Pentamidine isethionate	Prestwick	7	H	4	83	73.78
Benperidol	Prestwick	7	A	5	74.57	102.32
Propylthiouracil	Prestwick	7	B	5	59.074	94.83
Etifenin	Prestwick	7	C	5	60.077	89.49
Pyrazinamide	Prestwick	7	D	5	64.168	87.85
Tiabendazole	Prestwick	7	E	5	57.711	81.54
Atovaquone	Prestwick	7	F	5	69.804	76.46
Tobramycin	Prestwick	7	G	5	64.937	92.89
Tolazamide	Prestwick	7	H	5	76.208	82.44
Cefaclor	Prestwick	7	A	6	75.578	97.36
Terconazole	Prestwick	7	B	6	57.178	96.05
Metaproterenol sulfate, orciprenaline sulfate	Prestwick	7	C	6	26.411	87.07
Trimethadione	Prestwick	7	D	6	59.826	90.27
Rifampicin	Prestwick	7	E	6	60.249	87.53
Methoxamine hydrochloride	Prestwick	7	F	6	77.833	80.31
Tetramisole hydrochloride	Prestwick	7	G	6	63.573	92.28
Nifuroxazide	Prestwick	7	H	6	69.584	77.97
Colistin sulfate	Prestwick	7	A	7	73.908	104.95
Tiaprofenic acid	Prestwick	7	B	7	61.723	95.07
Sisomicin sulfate	Prestwick	7	C	7	58.494	91.65
Lovastatin	Prestwick	7	D	7	86.9	101.77
Ethionamide	Prestwick	7	E	7	65.784	78.07
(S)-(-)-Atenolol	Prestwick	7	F	7	78.685	76.7
Pregnenolone	Prestwick	7	G	7	67.071	95.42
Mirtazapine	Prestwick	7	H	7	79.143	81.29
Daunorubicin hydrochloride	Prestwick	7	A	8	0.959	2.21
Vancomycin hydrochloride	Prestwick	7	B	8	61.817	93.73
Sibutramine HCl	Prestwick	7	C	8	65.894	89.21
Nystatine	Prestwick	7	D	8	59.67	101.44
Tenoxicam	Prestwick	7	E	8	55.408	82.57
Piracetam	Prestwick	7	F	8	76.949	81.27
Molsidomine	Prestwick	7	G	8	66.412	91.86
Dirithromycin	Prestwick	7	H	8	71.454	82.54
Dosulepin hydrochloride	Prestwick	7	A	9	74.349	108.72
Artemisinin	Prestwick	7	B	9	59.011	90.02
Resveratrol	Prestwick	7	C	9	58.306	85.87
Budesonide	Prestwick	7	D	9	26.797	96.48
Triflusal	Prestwick	7	E	9	61.848	80.17
Phenindione	Prestwick	7	F	9	74.979	80.17
Chloroquine diphosphate	Prestwick	7	G	9	63.996	93.34
Gliclazide	Prestwick	7	H	9	72.413	80.17
Ceftazidime pentahydrate	Prestwick	7	A	10	65.047	105.57
Propafenone hydrochloride	Prestwick	7	B	10	49.797	99.12
Bromperidol	Prestwick	7	C	10	45.103	85.4
Imipenem	Prestwick	7	D	10	32.224	101.26
Mesoridazine besylate	Prestwick	7	E	10	56.567	84.84
Thiocolchicoside	Prestwick	7	F	10	67.903	82.65
Trimetazidine dihydrochloride	Prestwick	7	G	10	56.834	91.83
DO 897/99	Prestwick	7	H	10	55.33	80.08
Iobenguane sulfate	Prestwick	7	A	11	78.59	107.67
Ethamivan	Prestwick	7	B	11	58.933	97.34
Cyclizine hydrochloride	Prestwick	7	C	11	51.38	97.75
Sulfasalazine	Prestwick	7	D	11	43.578	97.38
Trolox	Prestwick	7	E	11	53.966	83.78
Clorsulon	Prestwick	7	F	11	61.801	85.6
Parthenolide	Prestwick	7	G	11	2.339	92.37
Prenylamine lactate	Prestwick	7	H	11	33.052	87.14
Ziprasidone Hydrochloride	Prestwick	8	A	2	89.088	113.25
Tetracaïne hydrochloride	Prestwick	8	B	2	90.792	117.98
Reboxetine mesylate	Prestwick	8	C	2	100.413	112.43
Emedastine	Prestwick	8	D	2	100.148	112.51
Tranilast	Prestwick	8	E	2	111.469	110.93
Harmalol hydrochloride dihydrate	Prestwick	8	F	2	111.469	112.95
Methoxy-6-harmalan	Prestwick	8	G	2	92.893	101.81
Alendronate sodium	Prestwick	8	H	2	103.464	115.54
Mevastatin	Prestwick	8	A	3	118.059	120.14
Mometasone furoate	Prestwick	8	B	3	38.972	123.57
Lobelanidine hydrochloride	Prestwick	8	C	3	116.306	112.79
Etofenamate	Prestwick	8	D	3	102.269	113.55
Tizanidine HCl	Prestwick	8	E	3	113.347	113.85
Harmol hydrochloride monohydrate	Prestwick	8	F	3	106.924	111.96
Amisulpride	Prestwick	8	G	3	97.768	114.33
Dipivefrin hydrochloride	Prestwick	8	H	3	57.556	110.55
Pyridostigmine iodid	Prestwick	8	A	4	112.273	108.31
Troglitazone	Prestwick	8	B	4	84.775	117.23
Papaverine hydrochloride	Prestwick	8	C	4	113.884	109.86
Zaleplon	Prestwick	8	D	4	103.597	112
Zafirlukast	Prestwick	8	E	4	108.125	96.06
Harmine hydrochloride	Prestwick	8	F	4	89.743	119.85
Pyridoxine hydrochloride	Prestwick	8	G	4	103.198	116
Thiorphan	Prestwick	8	H	4	107.458	114.69
Pentobarbital	Prestwick	8	A	5	116.98	110.18
Dacarbazine	Prestwick	8	B	5	99.486	106.75
Yohimbine hydrochloride	Prestwick	8	C	5	104.66	106.03
Diclofenac sodium	Prestwick	8	D	5	108.793	104.45
Butenafine	Prestwick	8	E	5	114.287	116.5
Carbidopa	Prestwick	8	F	5	111.603	105.95
Mercaptopurine	Prestwick	8	G	5	101.871	111.8
Tomoxetine hydrochloride	Prestwick	8	H	5	110.264	113.02
Atropine sulfate monohydrate	Prestwick	8	A	6	116.845	111.83
Tenatoprazole	Prestwick	8	B	6	103.729	108.52
Lobeline alpha (-) hydrochoride	Prestwick	8	C	6	108.927	111.65
Exemestane	Prestwick	8	D	6	91.71	109.85
Carbadox	Prestwick	8	E	6	111.737	95.27
Chrysene-1,4-quinone	Prestwick	8	F	6	102.136	99.51
Cytarabine	Prestwick	8	G	6	125.105	101.57
Lapatinib ditosylate	Prestwick	8	H	6	104.261	116.33
Eserine sulfate, physostigmine sulfate	Prestwick	8	A	7	118.329	108.55
Acetopromazine maleate salt	Prestwick	8	B	7	96.58	113.94
Alfacalcidol	Prestwick	8	C	7	103.065	98.13
Convolamine hydrochloride	Prestwick	8	D	7	101.208	112.53
Rimantadine	Prestwick	8	E	7	116.71	107.94
Demecarium bromide	Prestwick	8	F	7	114.96	111.75
Racecadotril	Prestwick	8	G	7	110.13	112.63
Penciclovir	Prestwick	8	H	7	115.767	112.66
Itraconazole	Prestwick	8	A	8	145.205	102.85
Escitalopram	Prestwick	8	B	8	96.052	111.4
Cilostazol	Prestwick	8	C	8	112.944	108.45
Temozolomide	Prestwick	8	D	8	109.194	103.75
Eburnamonine (-)	Prestwick	8	E	8	109.595	107.36
Quipazine dimaleate salt	Prestwick	8	F	8	121.304	105.6
Folic acid	Prestwick	8	G	8	111.871	113.96
Levetiracetam	Prestwick	8	H	8	110.398	107.46
Acarbose	Prestwick	8	A	9	116.98	110.32
Ropinirole HCl	Prestwick	8	B	9	110.532	107.99
Galanthamine hydrobromide	Prestwick	8	C	9	115.498	108.99
Xylazine	Prestwick	8	D	9	105.192	107.89
Oxibendazol	Prestwick	8	E	9	116.036	76.3
Acipimox	Prestwick	8	F	9	112.676	106.58
Benazepril HCl	Prestwick	8	G	9	105.725	109.1
Dexfenfluramine hydrochloride	Prestwick	8	H	9	103.464	111.1
Entacapone	Prestwick	8	A	10	120.627	111.66
Lacidipine	Prestwick	8	B	10	119.004	106.72
Azelastine HCl	Prestwick	8	C	10	116.44	111.61
Celiprolol HCl	Prestwick	8	D	10	106.791	100.84
Ipsapirone	Prestwick	8	E	10	113.884	112.19
Diflorasone Diacetate	Prestwick	8	F	10	49.267	99.05
Aniracetam	Prestwick	8	G	10	107.058	110.65
Etoricoxib	Prestwick	8	H	10	101.34	112.79
Nicotinamide	Prestwick	8	A	11	126.195	101.68
Argatroban	Prestwick	8	B	11	115.902	105.47
Etretinate	Prestwick	8	C	11	100.28	113.59
Zopiclone	Prestwick	8	D	11	125.378	107.25
Harmaline hydrochloride dihydrate	Prestwick	8	E	11	111.737	110.63
Harmane hydrochloride	Prestwick	8	F	11	107.591	112.93
Dimethisoquin hydrochloride	Prestwick	8	G	11	106.658	120.94
Sertindole	Prestwick	8	H	11	96.844	117.47
Sulmazole	Prestwick	9	A	2	84.171	103.92
Glimepiride	Prestwick	9	B	2	96.443	108.01
Pranlukast	Prestwick	9	C	2	80.837	107.17
Dydrogesterone	Prestwick	9	D	2	97.613	115.7
Pranoprofen	Prestwick	9	E	2	113.358	110.29
Tylosin	Prestwick	9	F	2	104.403	107.07
Trihexyphenidyl-D,L Hydrochloride	Prestwick	9	G	2	96.443	108.13
Sulfabenzamide	Prestwick	9	H	2	88.417	104.73
Gefitinib	Prestwick	9	A	3	123.876	102.72
Picrotoxinin	Prestwick	9	B	3	104.797	108.85
Penicillamine	Prestwick	9	C	3	115.479	108.87
Sumatriptan succinate	Prestwick	9	D	3	104.272	110.48
Secnidazole	Prestwick	9	E	3	118.801	110.52
Citalopram Hydrobromide	Prestwick	9	F	3	115.611	113.36
Succinylsulfathiazole	Prestwick	9	G	3	95.663	109.9
Benzocaine	Prestwick	9	H	3	98.915	101.57
Flunisolide	Prestwick	9	A	4	41.826	113.23
Mepenzolate bromide	Prestwick	9	B	4	111.375	109.2
Zileuton	Prestwick	9	C	4	109.792	108.25
Opipramol dihydrochloride	Prestwick	9	D	4	90.224	111.56
Pempidine tartrate	Prestwick	9	E	4	109.002	110.48
Promazine hydrochloride	Prestwick	9	F	4	106.765	108.38
Famprofazone	Prestwick	9	G	4	82.375	108.92
Dipyrone	Prestwick	9	H	4	95.923	105.61
N-Acetyl-DL-homocysteine Thiolactone	Prestwick	9	A	5	73.944	106.51
Benfotiamine	Prestwick	9	B	5	107.028	109.43
Loratadine	Prestwick	9	C	5	100.48	100.56
Nalidixic acid sodium salt	Prestwick	9	D	5	100.349	109.85
Clodronate	Prestwick	9	E	5	109.66	106.98
Sulfamerazine	Prestwick	9	F	5	106.24	109.81
Bromopride	Prestwick	9	G	5	98.655	107.64
Isosorbide dinitrate	Prestwick	9	H	5	96.313	102.39
Flurandrenolide	Prestwick	9	A	6	35.699	106.55
Halcinonide	Prestwick	9	B	6	45.455	107.91
Clindamycin Phosphate	Prestwick	9	C	6	111.64	105.05
Oxacillin Na	Prestwick	9	D	6	102.309	109.88
Nitrarine dihydrochloride	Prestwick	9	E	6	121.202	107.7
Venlafaxine	Prestwick	9	F	6	117.471	108.23
Methyl benzethonium chloride	Prestwick	9	G	6	93.069	108.67
Sulfachloropyridazine	Prestwick	9	H	6	93.458	103.3
Oxiconazole Nitrate	Prestwick	9	A	7	74.071	118.76
Lanatoside C	Prestwick	9	B	7	67.216	109.71
Nisoldipine	Prestwick	9	C	7	96.443	110.4
Beta-Escin	Prestwick	9	D	7	351.486	101.04
Thimerosal	Prestwick	9	E	7	31.696	31.46
Ethotoin	Prestwick	9	F	7	119.467	108.44
Chlorcyclizine hydrochloride	Prestwick	9	G	7	95.014	107
Pramoxine hydrochloride	Prestwick	9	H	7	101.002	110.09
Rebamipide	Prestwick	9	A	8	86.614	106.02
Benzamil hydrochloride	Prestwick	9	B	8	71.655	109.19
Foliosidine	Prestwick	9	C	8	105.059	112.85
Tiludronate disodium	Prestwick	9	D	8	116.275	112.45
Tramadol hydrochloride	Prestwick	9	E	8	117.072	113.06
3-alpha-Hydroxy-5-beta-androstan-17-one	Prestwick	9	F	8	130.33	113.75
Diphenylpyraline hydrochloride	Prestwick	9	G	8	99.176	112.61
Finasteride	Prestwick	9	H	8	104.534	106.74
Nilvadipine	Prestwick	9	A	9	85.713	105.73
Suxibuzone	Prestwick	9	B	9	80.709	108.8
Acitretin	Prestwick	9	C	9	89.449	115.11
Tazobactam	Prestwick	9	D	9	87	111.72
Estropipate	Prestwick	9	E	9	116.939	106.17
Tetrahydrozoline hydrochloride	Prestwick	9	F	9	110.979	110.39
Benzethonium chloride	Prestwick	9	G	9	131.681	94.1
Fluorometholone	Prestwick	9	H	9	39.325	104.12
Etanidazole	Prestwick	9	A	10	90.095	108.47
6-Furfurylaminopurine	Prestwick	9	B	10	80.197	109.89
Zonisamide	Prestwick	9	C	10	101.786	108.48
Ibandronate	Prestwick	9	D	10	88.546	112.03
Butylscopolammonium (n-) bromide	Prestwick	9	E	10	110.452	110.27
Hexestrol	Prestwick	9	F	10	108.212	112.04
Trioxsalen	Prestwick	9	G	10	92.94	112.93
Cephalothin sodium salt	Prestwick	9	H	10	71.655	106.35
Butirosin disulfate salt	Prestwick	9	A	11	98.524	99.9
Avermectin B1a	Prestwick	9	B	11	77.513	96.72
Irsogladine Maleate	Prestwick	9	C	11	98.264	105.51
Warfarin	Prestwick	9	D	11	90.224	104.82
Irinotecan Hydrochloride	Prestwick	9	E	11	96.703	85.25
Cefmetazole sodium salt	Prestwick	9	F	11	105.452	101.93
Doxofylline	Prestwick	9	G	11	57.625	100.92
Cefuroxime sodium salt	Prestwick	9	H	11	80.453	104.32
Althiazide	Prestwick	10	A	2	97.669	128.45
Sulfaquinoxaline sodium salt	Prestwick	10	B	2	98.54	133.43
Nadide	Prestwick	10	C	2	94.626	133.9
Terazosin hydrochloride	Prestwick	10	D	2	90.436	134.15
Butamben	Prestwick	10	E	2	99.847	129.44
Alclometasone dipropionate	Prestwick	10	F	2	42.965	147.13
Clobetasol propionate	Prestwick	10	G	2	35.638	145.81
(R) -Naproxen sodium salt	Prestwick	10	H	2	101.011	149.14
Isopyrin hydrochloride	Prestwick	10	A	3	114.33	134.59
Streptozotocin	Prestwick	10	B	3	104.654	132.34
Sulfamethizole	Prestwick	10	C	3	101.302	132.38
Phenazopyridine hydrochloride	Prestwick	10	D	3	87.123	126.85
Sulfapyridine	Prestwick	10	E	3	107.724	131.76
Leflunomide	Prestwick	10	F	3	97.959	130.89
Podophyllotoxin	Prestwick	10	G	3	89.427	104
Propidium iodide	Prestwick	10	H	3	109.921	143.75
Phenethicillin potassium salt	Prestwick	10	A	4	113.3	125.57
Metoprolol-(+,-) (+)-tartrate salt	Prestwick	10	B	4	107.431	129.68
Medrysone	Prestwick	10	C	4	62.727	133.02
Demeclocycline hydrochloride	Prestwick	10	D	4	96.364	129.35
Meclofenoxate hydrochloride	Prestwick	10	E	4	100.138	128.92
Norgestrel-(-)-D	Prestwick	10	F	4	90.581	118.4
Clofibric acid	Prestwick	10	G	4	79.52	134.66
Cloperastine hydrochloride	Prestwick	10	H	4	103.487	131.43
Sulfamethoxypyridazine	Prestwick	10	A	5	97.379	114.69
Flumethasone	Prestwick	10	B	5	37.048	132.56
Flunixin meglumine	Prestwick	10	C	5	100.865	126.14
Fenoprofen calcium salt dihydrate	Prestwick	10	D	5	90.581	124.76
Furaltadone hydrochloride	Prestwick	10	E	5	96.074	123.77
Fluocinonide	Prestwick	10	F	5	47.474	126.31
Bendroflumethiazide	Prestwick	10	G	5	85.111	131.34
Eucatropine hydrochloride	Prestwick	10	H	5	108.749	137.43
Deferoxamine mesylate	Prestwick	10	A	6	106.261	119.97
Flecainide acetate	Prestwick	10	B	6	85.398	132.21
Spiramycin	Prestwick	10	C	6	102.758	127.94
Piperacillin sodium salt	Prestwick	10	D	6	92.024	134.14
Ethoxyquin	Prestwick	10	E	6	97.814	135.35
Sulfamethazine sodium salt	Prestwick	10	F	6	86.117	140.98
Dicumarol	Prestwick	10	G	6	88.851	132.64
Isocarboxazid	Prestwick	10	H	6	94.481	124.16
Mephentermine hemisulfate	Prestwick	10	A	7	102.03	118.36
Cefazolin sodium salt	Prestwick	10	B	7	99.411	130.49
Glycopyrrolate	Prestwick	10	C	7	103.05	129.89
Diethylstilbestrol	Prestwick	10	D	7	103.924	127.01
Tinidazole	Prestwick	10	E	7	114.183	130.85
Guaifenesin	Prestwick	10	F	7	108.895	134.7
Methimazole	Prestwick	10	G	7	89.283	132.43
Lithocholic acid	Prestwick	10	H	7	98.83	91.66
Liranaftate	Prestwick	10	A	8	104.216	131.94
Atractyloside potassium salt	Prestwick	10	B	8	103.341	119.87
Cefamandole sodium salt	Prestwick	10	C	8	102.612	125.18
Chlorotrianisene	Prestwick	10	D	8	98.395	122.96
Guanadrel sulfate	Prestwick	10	E	8	103.195	126.98
Alexidine dihydrochloride	Prestwick	10	F	8	46.769	35.26
Merbromin	Prestwick	10	G	8	83.101	114.64
Methotrimeprazine maleat salt	Prestwick	10	H	8	94.916	102.26
Sulfadimethoxine	Prestwick	10	A	9	90.869	104.95
Folinic acid calcium salt	Prestwick	10	B	9	91.302	116.41
Monensin sodium salt	Prestwick	10	C	9	108.163	87.53
Ribostamycin sulfate salt	Prestwick	10	D	9	90.004	118.37
Vidarabine	Prestwick	10	E	9	114.183	123.32
Proadifen hydrochloride	Prestwick	10	F	9	85.973	114.24
Hexylcaine hydrochloride	Prestwick	10	G	9	65.988	126.58
Dienestrol	Prestwick	10	H	9	84.967	101.29
Sulfanilamide	Prestwick	10	A	10	104.216	117.11
Levonordefrin	Prestwick	10	B	10	44.515	115.82
Isoetharine mesylate salt	Prestwick	10	C	10	60.321	115.58
Methacholine chloride	Prestwick	10	D	10	93.613	119.87
Sulfameter	Prestwick	10	E	10	102.904	112
Zomepirac sodium salt	Prestwick	10	F	10	89.715	110.71
Drofenine hydrochloride	Prestwick	10	G	10	67.549	117.25
Pridinol methanesulfonate salt	Prestwick	10	H	10	81.238	116.06
Balsalazide Sodium	Prestwick	10	A	11	104.654	101.89
Ebselen	Prestwick	10	B	11	67.265	108.42
Mevalonic-D, L acid lactone	Prestwick	10	C	11	96.364	109.35
Pipenzolate bromide	Prestwick	10	D	11	87.411	109.21
Isopropamide iodide	Prestwick	10	E	11	101.884	119.62
Cinoxacin	Prestwick	10	F	11	92.602	120.07
Cycloheximide	Prestwick	10	G	11	10.866	41.09
Amrinone	Prestwick	10	H	11	72.526	102.6
Carbinoxamine maleate salt	Prestwick	11	A	2	111.298	90.56
Auranofin	Prestwick	11	B	2	-1.159	2.96
Azlocillin sodium salt	Prestwick	11	C	2	109.884	78.04
Butacaine	Prestwick	11	D	2	96.605	89.22
Olanzapine	Prestwick	11	E	2	125.688	87.99
Paroxetine Hydrochloride	Prestwick	11	F	2	116.654	89.48
Gabapentin	Prestwick	11	G	2	111.298	90.16
Iopamidol	Prestwick	11	H	2	112.556	77.92
Methazolamide	Prestwick	11	A	3	133.51	77.89
Cromolyn disodium salt	Prestwick	11	B	3	115.55	80.53
Clidinium bromide	Prestwick	11	C	3	121.876	71.53
Cefoxitin sodium salt	Prestwick	11	D	3	109.256	74.56
Trimeprazine tartrate	Prestwick	11	E	3	113.028	87.56
Nylidrin	Prestwick	11	F	3	91.174	88.18
Raloxifene hydrochloride	Prestwick	11	G	3	96.916	105.4
Iopromide	Prestwick	11	H	3	126.802	72.27
Pyrithyldione	Prestwick	11	A	4	131.909	97.9
Bucladesine sodium salt	Prestwick	11	B	4	138.648	97.2
Sulfamonomethoxine	Prestwick	11	C	4	128.077	115.71
Ifosfamide	Prestwick	11	D	4	106.591	98.81
Nafcillin sodium salt monohydrate	Prestwick	11	E	4	119.183	98.61
Liothyronine	Prestwick	11	F	4	115.865	88.8
Etidronic acid, disodium salt	Prestwick	11	G	4	104.713	98.76
Theophylline monohydrate	Prestwick	11	H	4	123.462	115.37
Spectinomycin dihydrochloride	Prestwick	11	A	5	127.439	98.57
Cefsulodin sodium salt	Prestwick	11	B	5	123.462	93.22
Benzthiazide	Prestwick	11	C	5	119.183	108.75
Novobiocin sodium salt	Prestwick	11	D	5	96.449	82.3
Procyclidine hydrochloride	Prestwick	11	E	5	108.001	87.42
Roxithromycin	Prestwick	11	F	5	107.374	83.82
Methylhydantoin-5-(D)	Prestwick	11	G	5	110.198	94.65
Theobromine	Prestwick	11	H	5	119.183	111.08
Piromidic acid	Prestwick	11	A	6	127.439	102.24
Fosfosal	Prestwick	11	B	6	118.867	95.38
Trichlormethiazide	Prestwick	11	C	6	119.974	110.72
Tetrahydroxy-1,4-quinone monohydrate	Prestwick	11	D	6	111.612	97.08
Amiprilose hydrochloride	Prestwick	11	E	6	113.816	94.18
Beclomethasone dipropionate	Prestwick	11	F	6	53.758	87.15
Simvastatin	Prestwick	11	G	6	162.41	106.16
Reserpine	Prestwick	11	H	6	103.775	107.16
Trimipramine maleate salt	Prestwick	11	A	7	117.286	90.98
Suprofen	Prestwick	11	B	7	123.304	100.02
Oxalamine citrate salt	Prestwick	11	C	7	105.338	108.15
Indoprofen	Prestwick	11	D	7	104.244	90.64
Ethynylestradiol 3-methyl ether	Prestwick	11	E	7	110.669	90.27
Tolmetin sodium salt dihydrate	Prestwick	11	F	7	85.145	84.43
Azacytidine-5	Prestwick	11	G	7	260.378	56.55
Bicalutamide	Prestwick	11	H	7	100.809	110.72
Chloropyramine hydrochloride	Prestwick	11	A	8	126.483	100.78
Catechin-(+,-) hydrate	Prestwick	11	B	8	110.512	95.83
Propantheline bromide	Prestwick	11	C	8	118.867	104.55
Carbenoxolone disodium salt	Prestwick	11	D	8	95.051	90.38
(-) -Levobunolol hydrochloride	Prestwick	11	E	8	98.472	85.49
(+) -Levobunolol hydrochloride	Prestwick	11	F	8	97.227	87.7
Paromomycin sulfate	Prestwick	11	G	8	106.434	89.88
Scopolamine hydrochloride	Prestwick	11	H	8	111.927	112.26
Furazolidone	Prestwick	11	A	9	102.994	94.5
Nadolol	Prestwick	11	B	9	116.97	91.92
Viloxazine hydrochloride	Prestwick	11	C	9	110.198	103.49
Iocetamic acid	Prestwick	11	D	9	100.029	86.86
Iodixanol	Prestwick	11	E	9	104.869	85.09
Doxazosin mesylate	Prestwick	11	F	9	88.852	89.5
Acetaminophen	Prestwick	11	G	9	106.278	90.43
Ioversol	Prestwick	11	H	9	109.57	111.15
Dichlorphenamide	Prestwick	11	A	10	111.298	102.59
Moxalactam disodium salt	Prestwick	11	B	10	122.51	100.11
Dimethadione	Prestwick	11	C	10	125.529	112
Ganciclovir	Prestwick	11	D	10	110.826	97.95
Rolitetracycline	Prestwick	11	E	10	119.658	82.88
Fluvastatin sodium salt	Prestwick	11	F	10	162.41	110.59
Phthalylsulfathiazole	Prestwick	11	G	10	96.449	97.91
Rabeprazole	Prestwick	11	H	10	102.837	117.39
Sulconazole nitrate	Prestwick	11	A	11	105.495	107.97
Aminophylline	Prestwick	11	B	11	116.97	101.86
Ethaverine hydrochloride	Prestwick	11	C	11	110.826	100.09
Ethopropazine hydrochloride	Prestwick	11	D	11	112.713	95.28
Equilin	Prestwick	11	E	11	114.919	92.41
Methylhydantoin-5-(L)	Prestwick	11	F	11	94.896	91.32
Luteolin	Prestwick	11	G	11	124.734	86.59
Carbachol	Prestwick	11	H	11	80.523	116.8
Niacin	Prestwick	12	A	2	95.632	111.88
Cortisol acetate	Prestwick	12	B	2	47.367	112.54
Hymecromone	Prestwick	12	C	2	85.367	126.29
(+)-Isoproterenol (+)-bitartrate salt	Prestwick	12	D	2	40.483	108.66
Nizatidine	Prestwick	12	E	2	112.235	115.82
Propofol	Prestwick	12	F	2	118.825	110.33
Pentetic acid	Prestwick	12	G	2	102.423	123.37
Crotamiton	Prestwick	12	H	2	101.387	133.48
Bemegride	Prestwick	12	A	3	116.874	118.08
Flubendazol	Prestwick	12	B	3	124.247	84.16
Caffeic acid	Prestwick	12	C	3	117.474	128.16
Monobenzone	Prestwick	12	D	3	115.825	101.23
Thioperamide maleate	Prestwick	12	E	3	114.777	104.2
S(-)Eticlopride hydrochloride	Prestwick	12	F	3	115.825	107.3
Bretylium tosylate	Prestwick	12	G	3	102.719	114.81
Toremifene	Prestwick	12	H	3	103.015	127.87
Digoxigenin	Prestwick	12	A	4	106.575	108.66
Felbinac	Prestwick	12	B	4	105.536	100.84
Diloxanide furoate	Prestwick	12	C	4	94.455	109.61
2-Aminobenzenesulfonamide	Prestwick	12	D	4	86.975	95.65
Xamoterol hemifumarate	Prestwick	12	E	4	107.765	100.93
Primidone	Prestwick	12	F	4	108.657	106.32
Pralidoxime chloride	Prestwick	12	G	4	105.387	109.71
(R)-(+)-Atenolol	Prestwick	12	H	4	106.575	126.7
Meglumine	Prestwick	12	A	5	105.833	91.28
Butylparaben	Prestwick	12	B	5	98.875	92.37
Metyrapone	Prestwick	12	C	5	99.761	94.87
Estrone	Prestwick	12	D	5	74.888	89.19
Rolipram	Prestwick	12	E	5	67.939	83.07
Flucytosine	Prestwick	12	F	5	99.761	88.68
Phenoxybenzamine hydrochloride	Prestwick	12	G	5	93.132	95.6
Tyloxapol	Prestwick	12	H	5	56.412	127.11
Cantharidin	Prestwick	12	A	6	16.828	25.98
[truncated: 3,647 more rows]
